1 **NF kappa B Regulator Bcl3 Controls Development and**  
2 **Function of Classical Dendritic Cells in *Toxoplasma gondii***  
3 **Infection**

4 June Guha<sup>1#</sup>, Byunghyun Kang<sup>1</sup>, Estefania Claudio<sup>1</sup>, Neelam R. Redekar<sup>2</sup>, Hongshan  
5 Wang<sup>1</sup>, Brian L. Kelsall<sup>1</sup>, Ulrich Siebenlist<sup>1\*</sup> and Philip M. Murphy<sup>1#</sup>

6

7 <sup>1</sup>Laboratory of Molecular Immunology, National Institute of Allergy and Infectious  
8 Diseases, National Institutes of Health, Bethesda, MD

9 <sup>2</sup>NIAID Collaborative Bioinformatics Resource, National Institute of Allergy and  
10 Infectious Diseases, National Institutes of Health, Bethesda, MD 20892 USA.

11

12 **#Correspondence:** Philip M. Murphy, M. D., Bldg. 10, Room 11N111, NIH, Bethesda, MD 20892  
13 USA; Tel: 301-496-8616; email: [pmm@nih.gov](mailto:pmm@nih.gov) and June Guha, Ph. D, Bldg. 10, Room B3-4233,  
14 NIH, Bethesda, MD 20892 USA; Tel: 301-761-7144; email: [june.guha@nih.gov](mailto:june.guha@nih.gov)

15

16 \*Deceased

17

## 18 **Abstract**

19 The atypical I $\kappa$ B family member Bcl3 associates with p50/NF- $\kappa$ B1 or p52/NF- $\kappa$ B2 homodimers  
20 in the nucleus, and positively or negatively modulates transcription in a context-dependent manner.  
21 In mice lacking Bcl3 globally or specifically in CD11c<sup>+</sup> cells, *Toxoplasma gondii* infection is  
22 uniformly fatal and is associated with an impaired Th1 immune response. Since Bcl3 expression  
23 in dendritic cells (DC) is pivotal for antigen presentation and since classical DCs (cDC) are major  
24 antigen presenting cells, we investigated the role of Bcl3 specifically in cDCs in *T. gondii* infection  
25 *in vivo* by crossing *Zbtb46* cre mice with *Bcl3<sup>flx/flx</sup>* mice. The conditional cDC Bcl3 KO was as  
26 susceptible to lethal *T. gondii* infection as the total Bcl3 KO and generated poor Th1 responses.  
27 Splenocyte single cell RNA seq in the model revealed defective Bcl3-dependent expression of  
28 genes involved in antigen processing. Consistent with this, soluble toxoplasma antigen  
29 presentation was impaired in Bcl3-deficient cDCs, and tetramer staining demonstrated defective  
30 *T. gondii* antigen-specific splenic CD4<sup>+</sup> and CD8<sup>+</sup> T cell responses in infected cDC *Bcl3<sup>-/-</sup>* mice.  
31 *In vitro* differentiation of bone marrow progenitors from wildtype and cDC *Bcl3<sup>-/-</sup>* mice using  
32 Flt3L, NOTCH and IFN- $\gamma$  stimulation recapitulated the defective Bcl3-dependent cDC antigen-  
33 presentation activity observed *in vivo*. Splenocyte single cell RNA seq also revealed the existence  
34 of a unique subpopulation of *Zbtb46<sup>+</sup>LysM<sup>+</sup>* DC which exhibited Bcl3-dependent expansion after  
35 infection. We also detected cDCs coexpressing the monocytic markers CD64 and Ly6C  
36 (designated icDC1 and icDC2) mainly in infected spleen, which were less abundant in *Bcl3<sup>flx/flx</sup>*  
37 *Zbtb46 cre* mice. Together, our results indicate that Bcl3 in classical DCs is a major determinant  
38 of protective T cell responses and survival in *T. gondii*-infected mice, and shapes DC ontogeny.

39

40

41 **Author Summary**

42 Dendritic cells initiate immune responses against invading pathogens. As professional antigen  
43 presenting cells they process and present antigen via the major histocompatibility complex to T  
44 cells and thus activate them. Bcl3, an atypical member of the I $\kappa$ B family regulates the APC  
45 function of dendritic cells. In this study we show that expression of Bcl3 specifically in classical  
46 DCs is critical for host protection against a protozoan parasite, *Toxoplasma gondii*. Host  
47 protective proinflammatory mechanisms are compromised in mice deficient in Bcl3 in classical  
48 DCs leading to an elevated organ parasite load and eventually death of the infected animals. We  
49 also found the emergence of Bcl3-dependent hybrid DCs upon *T. gondii* infection, which have  
50 mixed phenotypic markers from DCs and monocytes. Antigen processing genes are significantly  
51 downregulated in Bcl3-deficient cDCs, which may account for defective cross presentation of *T.*  
52 *gondii* antigens. In an in vitro differentiation model, we showed that development of  
53 XCR1<sup>+</sup>cross presenting cDC1s is critically regulated by Bcl3. Overall, this study reveals the  
54 complexity of dendritic cell ontogeny and the role of Bcl3 in classical DC function in the context  
55 of *Toxoplasma* infection.

56

57

## 58 **Introduction**

59 The NF- $\kappa$ B family of transcription factors acts as a master regulator of diverse physiological  
60 processes, from cell survival and proliferation to inflammatory responses against environmental  
61 stimuli and infectious agents. It consists of 2 subfamilies, Rel/NF- $\kappa$ B and I $\kappa$ B (inhibitor of  $\kappa$ B).  
62 The Rel/NF- $\kappa$ B subfamily members include Rel A, Rel B, c-Rel, p50 and p52, which form  
63 homo- or heterodimers and are able to modulate transcription of target genes by binding to  $\kappa$ B  
64 enhancer elements [1]. The I $\kappa$ B subfamily regulates NF- $\kappa$ B function and is divided into two  
65 subgroups, the classical (I $\kappa$ B $\alpha$ , I $\kappa$ B $\beta$ , I $\kappa$ B $\epsilon$ , p100 and p105) and atypical I $\kappa$ B proteins (Bcl3,  
66 I $\kappa$ B $\zeta$  and I $\kappa$ B NS). Classical I $\kappa$ B proteins inhibit NF- $\kappa$ B dimers through direct interactions in the  
67 cytoplasm. Following cell activation, classical I $\kappa$ B proteins become phosphorylated and  
68 subjected to ubiquitin-mediated degradation which releases NF- $\kappa$ B dimers for translocation to  
69 the nucleus to activate target genes [2]. In contrast, atypical I $\kappa$ B proteins do not undergo  
70 activation-dependent cytoplasmic degradation and instead modulate transcription in the nucleus  
71 [3].

72 Bcl3 (B cell lymphoma factor 3) was originally identified as a gene involved in genomic  
73 translocations in cases of B cell chronic lymphocytic leukemia (B-CLL) [4]. Bcl3 preferentially  
74 transactivates p50 or p52 homodimers by interactions involving its ankyrin domains; however, it  
75 may inhibit or stimulate transcription of NF- $\kappa$ B target genes in a highly context-dependent  
76 manner [5, 6]. Analysis of Bcl3 knockout mice has revealed diverse immunoregulatory roles, for  
77 example, in T and B lymphocyte development [7, 8], proper formation of splenic architecture  
78 [9], terminal differentiation of memory CD8<sup>+</sup> T cells [10] and dendritic cell function [11].  
79 Accordingly, Bcl3 deficient mice have been reported to have increased susceptibility to

80 infectious agents, including *Klebsiella pneumoniae*, *L. monocytogenes*, *S. pneumoniae* and  
81 *Toxoplasma gondii*. [12, 13].

82 *Toxoplasma gondii* is an opportunistic obligate intracellular protozoan and a member of the  
83 phylum Apicomplexa. It is capable of infecting almost all nucleated cells and can establish a  
84 long-term latent infection in the host. *Toxoplasma* has a complex life cycle in mammals,  
85 including a sexual reproductive cycle in definitive feline hosts, and an asexual cycle in  
86 intermediate hosts, which include humans. The clinical presentation is variable and depends on  
87 the immune status of the infected host. Immunocompetent individuals may develop a  
88 mononucleosis syndrome or remain asymptomatic, but in both cases go on to develop life-long  
89 latent infection. However, in immunocompromised hosts the parasite may reactivate resulting in  
90 toxoplasma encephalitis or retinochoroiditis. The infection may be particularly life-threatening to  
91 the fetus during pregnancy, resulting in congenital developmental abnormalities, including  
92 hydrocephalus, microcephaly, cerebral calcifications, retinochoroiditis, blindness, epilepsy,  
93 motor retardation, and anemia[14, 15] .

94 After infection, *T. gondii* replicates rapidly as a tachyzoite form by endogeny, then lyses the  
95 infected cell and spreads to neighboring cells. The organism can cross the blood brain barrier and  
96 ultimately become encysted in brain and skeletal muscle as a slowly replicating bradyzoite form  
97 resulting in latent infection [16]. *T. gondii* infection leads to a strong cell-mediated immune  
98 response. After transmigration across polarized epithelial cells, the parasite encounters dendritic  
99 cells which sense the pathogen and produce large amounts of IL-12, which activates NK cells to  
100 produce IFN- $\gamma$  during the acute phase. Subsequently, parasite-specific Type 1 CD4<sup>+</sup> T cells and  
101 cytotoxic CD8<sup>+</sup> T cells produce IFN- $\gamma$  as the infection enters a chronic phase [17]. Dendritic  
102 cells coordinate the immune response through antigen presentation and pro-inflammatory

103 cytokine production, particularly IL-12, resulting in priming of CD4<sup>+</sup> and CD8<sup>+</sup> T cells for IFN- $\gamma$   
104 production.

105 Dendritic cell (DC) differentiation is highly organ-specific and depends on the inflammation  
106 status of the host. Hematopoietic progenitor cells differentiate into common myeloid and  
107 lymphoid progenitors (CMP and CLP) that give rise to precursors to classical DCs (cDCs) and  
108 plasmacytoid DCs (pDCs), respectively in the bone marrow. These precursors are released into  
109 the blood and subsequently seed both lymphoid and non-lymphoid tissues where they develop  
110 into mature cDCs and pDCs. cDCs are further divided into cDC1 and cDC2 populations based  
111 on expression of surface molecules and dependence on unique transcription factors (TFs) for  
112 their development. cDC1 are characterized largely as CD11c<sup>+</sup>MHC II<sup>+</sup>CD11b<sup>-</sup> XCR1<sup>+</sup> cells and  
113 express CD103 in peripheral tissues, and CD8 $\alpha\alpha$  in lymphoid tissues. cDC1s are dependent on  
114 the TFs Irf8, Batf3, Nfil3, and Id2. In contrast, cDC2s are largely CD11c<sup>+</sup>MHC  
115 II<sup>+</sup>CD11b<sup>+</sup>Sirpa<sup>+</sup> and rely on Irf4 for their full development, but are more heterogeneous in that  
116 some express CD103 in the intestine, and subsets have been defined that rely on either Notch 2  
117 or Klf4 for their differentiation [18, 19].

118 In nonlymphoid organs, 1-5% of cells are cDCs comprised of CD103<sup>+</sup>CD11b<sup>-</sup> cDC1 and  
119 CD11b<sup>+</sup> cDC2 subsets, although a minor population of CD11b<sup>-</sup>CD103<sup>-</sup> cells is present in the  
120 intestine which remains less well defined. In the spleen and LNs, CD8<sup>+</sup> cDC1s constitute 20-  
121 40% of total cDC, the rest being CD11b<sup>+</sup> cDC2s and pDCs. cDC1 and cDC2 migrating in lymph  
122 from peripheral tissues (designated cDC1mig and cDC2mig) express CCR7 and are usually  
123 abundant in T cell zones of draining lymph nodes (LNs). They can usually be distinguished from  
124 resident DCs in the steady state by relatively higher MHCII and lower CD11c expression,  
125 however under inflammatory conditions, when resident DCs are activated, they can no longer be

126 distinguished by these markers. Resident LN DCs on the other hand are derived from blood  
127 precursors and remain in organized lymphoid tissues [20] .

128 cDCs play critical roles in both innate and adaptive immunity. cDC1s regulate CD8<sup>+</sup> and Th1 T  
129 cell responses against viruses and intracellular pathogens by providing high amounts of IL-12,  
130 and by cross-presenting antigen to naïve CD8<sup>+</sup> T cells. cDC2s are critical for initiating immune  
131 responses against extracellular bacteria and fungi. They are thought to be highly capable of  
132 priming CD4<sup>+</sup> T cells, produce IL-23, IL-6 and TGF- $\beta$  which contributes to the polarization of  
133 Th17 cells [19] , and in some contexts strongly drive the differentiation of Th2 cells. However,  
134 these functional attributes of cDC1 and cDC2 are somewhat plastic, particularly in infections and  
135 other inflammatory conditions, where cDC2s for example can cross-present antigen to CD8 T  
136 cells, and cDC1 are fully capable of presenting antigens to naïve CD4<sup>+</sup> T cells. Finally,  
137 monocytes are also known to differentiate into inflammatory cells during infection and other  
138 inflammation which are capable of presenting antigens to CD4<sup>+</sup> and CD8<sup>+</sup>T cells and have thus  
139 been referred to as monocyte-derived DCs (moDCs) by some authors [21] . Overall, DC  
140 ontogeny is constantly revised, with tissue-specific factors coordinating the generation of  
141 specific DC populations in a particular niche and inflammatory context.

142 In the context of *T. gondii* infection, it is well established that infected cDCs act as Trojan horses  
143 carrying the parasite to peripheral lymphoid organs, while infected and bystander cDCs produce  
144 IL-12 that acts to induce early IFN- $\gamma$  from NK cells, and later to drive Th1 and CD8<sup>+</sup> T cell  
145 responses that provide IFN- $\gamma$  to activate effector molecules and mechanisms [22, 23] . In the  
146 intestinal mucosa, CD103<sup>+</sup>CD11b<sup>-</sup> and CD103<sup>-</sup>CD11b<sup>-</sup> cDCs are the primary sources of IL-12 in  
147 response to *T. gondii* [24] .

148 We previously showed that Bcl3 regulates the APC function of DCs [11]. We also showed that  
149 infection with *Toxoplasma gondii* is uniformly fatal in mice globally deficient in Bcl3 (*Bcl3*<sup>-/-</sup>),  
150 which correlated with a defective Th1-type response [9]. We further showed that mice  
151 conditionally depleted of Bcl3 in CD11c<sup>+</sup> cells, which include DCs, monocytes, macrophages  
152 and other mononuclear leukocytes, clinically phenocopied the complete knockouts and had  
153 impaired production of IFN- $\gamma$  in CD4<sup>+</sup> and CD8<sup>+</sup> T cells, whereas innate immunity appeared to  
154 be intact [13]. In the present study, we investigated the specific role of classical dendritic cells in  
155 control of *T. gondii* infection in mice.

156



157 **Results**

158 **Lack of Bcl3 in classical dendritic cells increases host susceptibility to fatal *T. gondii***  
159 **infection**

160 We have previously defined a critical role for the atypical I $\kappa$ B family member Bcl3 in host  
161 defense against fatal infection with the protozoan *Toxoplasma gondii*. Infection was uniformly  
162 fatal in that study in both complete Bcl3 KO (*Bcl3*<sup>-/-</sup>) mice and conditional *Bcl3*<sup>flx/flx</sup> mice crossed  
163 with CD11c cre mice, suggesting that resistance requires expression of Bcl3 in DCs, monocytes  
164 and/or other CD11c-expressing immune cell types. In the present study, we have investigated  
165 specific Bcl3-expressing DC subsets that may be involved by crossing *Bcl3*<sup>flx/flx</sup> mice with  
166 *Zbtb46* cre mice, in which Bcl3 is selectively deleted in classical DCs (**Fig. S1A, B**). Wildtype  
167 C57BL/6 mice and *Bcl3*<sup>flx/flx</sup> mice were used as controls.

168 Mice were infected intraperitoneally with 15 cysts of the ME 49 strain of *T. gondii*, then were  
169 observed for 40 days for mortality and weight changes. All Bcl3 KO mice were uniformly  
170 susceptible to fatal *T. gondii* infection, whereas almost all wildtype mice survived until they were  
171 euthanized at day 40 post infection (PI) (**Fig. 1A**). Survival curves for the *Bcl3*<sup>flx/flx</sup> *Zbtb46* cre  
172 and *Bcl3*<sup>-/-</sup> mice were superimposable. *Bcl3*<sup>flx/flx</sup> *Zbtb46* cre<sup>-</sup> littermates from the conditional  
173 knockout line showed no significant difference from wildtype mice for parasite burden over time  
174 in lung and spleen, which controls for potential effects of genetic drift and environmental  
175 differences (**Fig. S2A, B**). The body weights of all mice in all three study groups decreased after  
176 infection. However, whereas weight loss in wildtype mice stopped at approximately day 20 post  
177 infection, all mice in both knockout groups continued to lose weight until they were found dead  
178 or until preset weight loss criteria for euthanasia were met (**Fig. 1B**). These results indicate that

179 lack of Bcl3 specifically in classical dendritic cells increases host susceptibility to fatal *T. gondii*  
180 infection.

181 Although wild type and Bcl3 knockout mice both had increased parasite loads in all organs  
182 surveyed, the kinetic patterns varied considerably, as quantitated by measuring *T. gondii* B1 gene  
183 expression by real time PCR. Terminal brain parasite loads in both total and conditional Bcl3  
184 KO mouse groups dying ~20-30 days PI were significantly higher compared to parasite loads in  
185 the brains of wildtype mice sacrificed at either 20 days PI or on day 40 PI, the termination point  
186 of the experiment (**Fig. 1C** and **Fig. S1C**). In contrast, the spleen parasite loads for both  
187 knockout groups were similar to wild type levels on day 7 PI. However, wildtype mice were  
188 then able to clear the parasite from spleen by 21 days PI, whereas for both KO groups parasite  
189 loads at day 21 PI persisted at the same levels found on day 7 PI (**Fig. 2A**). A third kinetic  
190 pattern occurred in the lung, in which parasite loads in knockout mice were similar to wildtype  
191 levels on day 7 PI, but diverged thereafter, increasing in the knockouts by day 21 PI, while  
192 remaining unaltered in wildtype mice (**Fig. S2C**).

193 Lung, spleen and liver from wild type and knockout mice were next evaluated histologically  
194 before and after *T. gondii* infection. In lung from infected mice, we detected perivascular and  
195 peribronchiolar 10-20 mm diameter protozoal cysts in infected lung. At 21 days PI, overall  
196 inflammation and cyst burden were both higher in all Bcl3 total KO mice and *Bcl3<sup>flx/flx</sup> Zbtb46*  
197 *cre* mice than in wildtype mice (**Fig. S2D**). At baseline, spleen size was similar among *Bcl3*  
198 knockouts and wild type mice. However, 21 days after infection we observed moderate to  
199 marked enlargement of the spleen in all knockout groups compared to wildtype controls which  
200 was accompanied by hyperplasia of resident splenic lymphoid tissue but minimal

201 inflammation. There was no evidence of significant inflammation in the liver or cyst  
202 accumulation in either spleen or liver (data not shown).

203 **Impaired immune responses to *T. gondii* in classical dendritic cell specific Bcl3-deficient**  
204 **mice**

205 A type 1 IFN- $\gamma$ -dependent immune response has previously been established as a critical factor  
206 for immunological control of *T. gondii* infection. Early innate defenses are intact even in the  
207 absence of Bcl3, as initial production of IL-12 by dendritic cells and IFN- $\gamma$  by NK cells are  
208 unaffected. However, subsequent production of IFN- $\gamma$  by CD4<sup>+</sup> and CD8<sup>+</sup> T-cells is severely  
209 compromised in complete Bcl3 knockout mice and conditional CD11c Bcl3 knockout mice.  
210 Here we confirmed this precedent and extended it by interrogating cDC Bcl3-deficient mice  
211 specifically.

212 First, we investigated the state of the immune system at baseline in lung and spleen in naïve  
213 uninfected wild type and knockout animals (**Fig. S3A, B**). The content of CD11c<sup>+</sup>MHC II<sup>+</sup> cells,  
214 which include dendritic cells, was similar for wildtype and both complete and conditional Bcl3-  
215 deficient strains in both organs. Conditional Bcl3 knockout mice had reduced frequencies of B  
216 cells and neutrophils, but only in lung, not in spleen, whereas *Bcl3*<sup>-/-</sup> mice had a lower frequency  
217 of B cells, neutrophils, T cells and monocytes in both organs. These results are consistent with  
218 and extend our previous report of impaired germinal center reactions associated with reduced B  
219 cell numbers in the spleen of complete *Bcl3*<sup>-/-</sup> mice [9].

220 In serum, we found that both IFN- $\gamma$  and IL-12 levels were markedly increased at both 7 and 21  
221 days after infection in both wildtype and *Bcl3*<sup>flx/flx</sup> *Zbtb46 cre*<sup>-</sup> (Bcl3 sufficient) mice compared to  
222 levels in uninfected control mice (**Fig. 2B, C, Fig. S2E, F**). In contrast, *T. gondii* infection

223 resulted in markedly reduced serum levels of both IFN- $\gamma$  and IL-12 in complete Bcl3 KO mice as  
224 well as in *Zbtb46* cre conditional Bcl3 KO mice compared to levels induced by infection of wildtype  
225 mice.

226 To delineate the mechanisms underlying Bcl3-dependent Type 1 cytokine production in the  
227 model, we harvested total splenocytes from wild type and Bcl3 knockout mice 7 days PI. The  
228 total spleen content of MHC-II<sup>+</sup>CD11c<sup>+</sup> DCs was comparable for wildtype and KO mice. After  
229 stimulation in vitro with soluble toxoplasma antigen (STAg) for 72 hr, high levels of IFN- $\gamma$ , IL-  
230 12 and nitric oxide accumulated in the supernatants of cells from infected wild type mice  
231 compared to cells from uninfected wild type mice, whereas accumulation of all three mediators  
232 was significantly lower after stimulation of splenocytes from both complete and conditional Bcl3  
233 knockout mice (**Fig. 2D**).

### 234 **Bcl3 modulates the distribution of multiple splenic dendritic cell subsets in *T. gondii*-** 235 **infected mice**

236 Next, we interrogated how DCs might be regulated at the level of gene expression by Bcl3 under  
237 inflamed conditions in *T. gondii*-infected mice. For this, infected and uninfected wildtype and  
238 *Bcl3<sup>flx/flx</sup> Zbtb46 cre* mice were sacrificed 7 days PI, and CD11c<sup>+</sup> splenocytes were purified and  
239 immediately processed to generate single cell RNA sequencing libraries, which were then  
240 sequenced. Using Immgen-based cell auto-annotation [25] mononuclear phagocytes (MPs) and  
241 DCs were identified and dissected into cDC1, migratory cDC1 (cDC1mig), cDC2, migratory  
242 cDC2 (cDC2mig), plasmacytoid DCs (pDCs), monocytes and splenic macrophages [26] (**Fig.**  
243 **S4A-C**), and this was confirmed by examining the expression pattern of the signature genes for  
244 each subset (**Fig. S4D**). To understand the transcriptomic effects of Bcl3 on splenic DCs, we  
245 selected cDC1, cDC1mig, cDC2 and cDC2mig for further analysis. Unsupervised clustering

246 revealed 13 subpopulations among classical DCs (6 subclusters of cDC1, including cDC1mig,  
247 and 7 subclusters of cDC2, including cDC2mig) (**Fig. 3A, B**). From the differential gene  
248 expression analysis, we found common genes for cDC1 and cDC2, as well as subset-defining  
249 genes. In particular, cDC1 subpopulations expressed *Cxcl9*, *Cst3*, *Irf8*, *Xcr1*, *CD24a* and *CD8a*  
250 in common, whereas cDC2 subpopulations all expressed *Ppp1r14a*, *Ltb*, *Adam23*, *Adgrl3*, *Cybb*,  
251 *Rgs2*, *Ltb*, *Kit*, *Lyz2*, *Zeb2*, *Fyb* and S100 calcium-binding protein family members in common.  
252 Migratory subpopulations of both cDC1 and cDC2 expressed *Ccr7*, *Tuba1a*, *Fscn1*, *Ccl5* and  
253 *Cxcl6*, which are known to be important for cell migration and lymphocyte activation. Compared  
254 to cDC1mig, cDC2mig showed much higher expression of NF- $\kappa$ B pathway molecules, e.g.,  
255 *Socs2*, *Traf1*, *Stat4*, *Relb* and *Map4k4*.

256 Among the cDC1 subsets, clusters 6 and 8 showed relatively higher expression of *Btla* and  
257 *Wdfy4*, which are important for peripheral regulatory T cell induction [27] and antigen cross-  
258 presentation [28]. These cells also expressed *Tlr3*. Cluster 8 from cDC1 and cluster 7 from cDC2  
259 expressed cell cycle-related genes, including *Top2a*, *Mki67*, *Cenpe*, *Birc5* and *Cdk1*, suggesting  
260 they may be potential DC progenitors. Clusters 9, 11 and 12 were smaller but also displayed  
261 interesting features. Cluster 9 expressed the pDC markers *CD209a*, *Bst2*, *Ly6c2* and *Siglech*;  
262 however, the expression levels of these genes were far lower than for true pDCs, which were  
263 filtered out in the preprocessing step. Clusters 11 and 12 expressed cDC1 and cDC2 signature  
264 genes, respectively; however, both also expressed macrophage signature genes.

265 Next, we asked how *Bcl3* deficiency during *T. gondii* infection affects the proportion of splenic  
266 DC subsets. For this, each cluster size was quantitated under the four different experimental  
267 conditions (wildtype uninfected, *Bcl3<sup>flx/flx</sup> Zbtb46 cre* uninfected, wildtype infected and *Bcl3<sup>flx/flx</sup>*  
268 *Zbtb46 cre* infected) (**Fig. 3C**). Cluster size was not significantly different for wildtype and

269 *Bcl3<sup>flx/flx</sup> Zbtb46 cre* mice in the steady state before infection. *T. gondii* infection increased the  
270 percentage of both the cDC1mig and cDC2mig clusters to a similar extent in both wildtype and  
271 *Bcl3<sup>flx/flx</sup> Zbtb46 cre* mice (**Fig. 3C, S5A**). Migratory DCs from infected KO mice expressed  
272 more of the cytokines Il1b and Il27, and the chemotactic factors Ccr7, Cxcl9, Ccl5 and Ccl22  
273 than migratory DCs from infected wildtype mice (**Fig. 3D; Table S1**).

274 The proportional distribution of cDC1 sub-clusters observed in wildtype mice did not change  
275 appreciably after *T. gondii* infection, with only minor reductions in the size of clusters 6 and 10.  
276 In contrast, infection of *Bcl3<sup>flx/flx</sup> Zbtb46 cre* mice resulted in increased size of subclusters 0, 8  
277 and 11, and decreased size of subcluster 6. Infection of wildtype mice induced larger distortions  
278 of cDC2 than cDC1 subcluster distribution. In particular, the size of subclusters 1, 3, 9 and 12  
279 decreased, whereas the size of subclusters 2 and 7 increased. Infection of *Bcl3<sup>flx/flx</sup> Zbtb46 cre*  
280 mice also resulted in decreased size of cDC2 subclusters 1, 3, 9 and 12, whereas the size of  
281 cDC2 subclusters 2 and 7 did not change significantly. Moreover, larger changes in gene  
282 expression were observed in the comparison of wildtype- and *Bcl3<sup>flx/flx</sup> Zbtb46 cre* -infected  
283 cDC2 than for the cDC1 comparison (**Fig. 3D**).

284 Next, we searched the DC transcriptomic data for specific functional classes of differentially  
285 expressed genes, focusing first on genes involved in antigen presentation (**Fig. 3E, S5B, Table**  
286 **S2**). cDC1 cells from both uninfected wildtype and uninfected *Bcl3<sup>flx/flx</sup> Zbtb46 cre* mice  
287 expressed similar levels of genes related to antigen presentation except those related to MHC  
288 class Ib genes (H2-M3, Mr1, Cd1d), which seemed to be affected by *Bcl3* deficiency even in the  
289 absence of infection. Moreover, cDC2 cells from uninfected *Bcl3<sup>flx/flx</sup> Zbtb46 cre* mice had only  
290 slightly increased expression of genes involved in Class II antigen presentation (CD74, H2-Ab1,  
291 H2-Aa and H2-Eb1) from uninfected wildtype mice. In contrast, the expression level of genes

292 involved in antigen presentation was changed dramatically in the cells from wildtype infected  
293 mice as compared to cells from uninfected mice: *T. gondii* infection increased the expression  
294 level of genes related to proteasome components, proteases (cathepsins), protease inhibitors  
295 (cystatins) and peptide delivery from the cytosol into the endoplasmic reticulum (ER) (Tap1,  
296 Tap2, Tapbp, Tapbpl) in both cDC1 and cDC2 cells. Interestingly, the level of genes encoding  
297 peptidases (Tpp1, Tpp2, Nrd1, Erap1), which are known to be required for the generation of  
298 most MHC class I-binding peptides, were decreased after infection. Class I pathway related  
299 genes (B2m, H2-K1, H2-D1) were increased or slightly increased in wild-type infected cDC1  
300 and cDC2 cells, respectively, whereas Class II pathway related genes were overall  
301 downregulated in cDC2 cells from infected wildtype mice as compared to cells from uninfected  
302 mice. Striking changes from the comparison between wildtype and Bcl3 KO cells from infected  
303 mice were observed in the category of antigen processing genes: cDC1 cells showed reduced  
304 levels of genes associated with peptide delivery. Additionally, most cathepsins and cystatins  
305 were significantly decreased in both cDC1 and cDC2 cells. Together, these changes suggest a  
306 reduced capacity for cross-presentation in Bcl3 KO cDC1 cells compared to wildtype even  
307 though the expression level of MHC class I genes was intact or slightly increased in KO cells.  
308 The overall expression level of genes involved in proteasome assembly was unaltered by Bcl3  
309 knockout in the context of *T.gondii* infection.

310 Since DC Bcl3 deficiency has previously been reported to accelerate apoptosis of bone marrow–  
311 derived DCs during Ag presentation to T cells, and to impair DC survival in the context of  
312 inflammatory conditions [11], we next interrogated genes associated with apoptosis and  
313 inflammation in the data set, visualizing the results by tSNE transformation (**Fig. S5C, D, Table**  
314 **S2**). As expected, *T. gondii* infection per se induced dramatic changes in expression of apoptosis

315 and inflammation-related genes. Cluster 1, a subcluster of cDC2, showed the most significant  
316 differences in distribution of these functional classes of differentially expressed genes under both  
317 uninfected and infected conditions.

318 Next, we examined the expression patterns of genes encoding transcription factors with  
319 particular attention to *Zbtb46* because it is a hallmark of classical DCs and because we used its  
320 promoter to delete *Bcl3* in cDCs using cre/lox technology. We identified unique DC  
321 subpopulations that coexpressed both *Zbtb46* and *LysM*, a transcription factor previously  
322 thought to be exclusively expressed in monocytes and macrophages. These dual-positive or  
323 hybrid cells were mainly found in cluster 6 in both uninfected wildtype and *Bcl3<sup>flx/flx</sup> Zbtb46 cre*  
324 mice; however, after infection of wildtype mice they became widely distributed among all the  
325 DC clusters. Compared to infected wildtype mice, the frequency of *Zbtb46<sup>+</sup>LysM<sup>+</sup>* dual positive  
326 cells were markedly reduced in infected *Bcl3<sup>flx/flx</sup> Zbtb46 cre* mice (**Fig. 3F, upper panel, and**  
327 **Fig. S5E, F**). A second monocyte/macrophage gene *Ly6C* and the classical DC gene *XCR1*  
328 were also coexpressed in some clusters but these hybrid cells were only marginally detected in  
329 uninfected mice. Infected wildtype mice showed a significant increase in this population, which  
330 in contrast was diminished in frequency in infected *Bcl3<sup>flx/flx</sup> Zbtb46 cre* mice (**Fig. 3F, middle**  
331 **panel, and Fig. S5E, F**). Finally, we found that cells coexpressing *Ly6C* and the cDC2 marker  
332 gene *Sirpa* were significantly more frequent in infected wildtype mice compared to infected  
333 conditional KO mice (**Fig. 3F, lower panel, and Fig. S5E, F**). Thus, the data suggest that *T.*  
334 *gondii* infection may induce differentiation of unique DC subpopulations with dual  
335 monocyte/macrophage and DC characteristics at the transcriptomic level.

336 To understand the physiological significance of the hybrid cells, we decided to perform  
337 functional enrichment analysis (Ingenuity Pathway Analysis). For this, *Zbtb46* and *Lyz2* dual



338 positive cells were sorted out from the four different experimental conditions (**Fig. S6 A**). The  
339 expression level of Lyz2 in these dual positive cells was much lower than in splenic  
340 macrophages, which reaffirms these cells are not monocytes/macrophages (**Fig. S6 B**). We also  
341 found that *T.gondii* infection induced Lysozyme M expression exclusively in wildtype mice,  
342 however, classical DC lacking Bcl3 do not show an infection induced upregulation in its  
343 expression (**Fig. S6 C**). DEGs from comparisons between hybrid and nonhybrid cells from  
344 uninfected or infected conditions, or comparisons between wildtype and Bcl3 KO hybrid cells  
345 from uninfected or infected conditions were used as an input. Unlike hybrid cells in steady state,  
346 which seem to be quiescent (**Fig. S6 D**), hybrid cells in *T.gondii* infection clearly showed  
347 stronger immune cell response related pathways, like Th1 pathway, TCR signaling, CD28  
348 signaling, iNOS signaling, unfolded protein response, phagosome formation and etcs, suggesting  
349 their potential contribution to anti-intracellular bacterial immune responses (**Fig. S6 E**).  
350 Comparison between uninfected vs infected hybrid cells showed increased signaling through  
351 canonical IFN signaling pathway, activation of IRF, dendritic cell maturation, NF-kB signaling  
352 and oxidative phosphorylation in infected hybrid cells (**Fig. S6 F**). Further analysis between  
353 wildtype and Bcl3 KO cells from infected mice revealed unregulated up-regulated phagosome  
354 formation and unfolded protein response, indicative of their superior antigen processing and  
355 presentation capacity (**Fig. S6 H**). Importantly, cell cycle checkpoint related pathways were  
356 increased in KO cells. There were no significant changes between uninfected hybrid cells from  
357 wildtype and Bcl3 KO counterparts by IPA (**Fig. S6 G**). Altogether, Zbtb46 and Lyz2 dual  
358 positive cells are immunologically more activated type of DCs emerged in response to the pro-  
359 inflammatory cytokines e.g. interferons in *T.gondii* infected condition where Bcl3 plays a key  
360 role to maintain the hybrid cells and their anti-intracellular bacterial capacity.

361 **Immunophenotypic characterization of two novel DC subsets, icDC1 and icDC2, regulated**  
362 **by Bcl3 expression and *T. gondii* infection**

363 Based on the single cell RNA seq data, we revisited the identity of DC subsets in the spleen and  
364 lung 7 days PI using cell surface markers and flow cytometry. We identified two subsets of  
365 cDC1 and cDC2, which we have designated icDC1 and icDC2 due to their high frequency in  
366 lung and spleen from *T. gondii*-infected mice compared to uninfected mice. Both subsets were  
367 found in wild type mice as well as in complete and conditional Bcl3 knockout mice. In addition  
368 to the conventional DC markers CD11c, MHC II, CD24, CD8 and CD11b, icDC1 are defined by  
369 co-expression of XCR1 and Ly6C, which is a prototypic marker for the monocytic/macrophage  
370 lineage and inflammatory DCs, and icDC2 are defined by co-expression of CD11b and Ly6C.  
371 Both icDC1 and icDC2 also express CD64, another macrophage marker (**Gating strategy Fig.**  
372 **4A, and Fig. S7A**). The difference in frequency of these subsets in infected versus uninfected  
373 mice defined by flow cytometry aligned with the difference in frequency as defined by the RNA  
374 seq data.

375 As early as 7 days after infection, dramatic but transient increases in both the frequency and  
376 number of icDC1 occurred in both spleen and lung in wild type mice, however this increase was  
377 markedly reduced in infected total Bcl3 KO mice (**Fig. 4B, and Fig. S7B**). icDC2 levels were  
378 also increased by infection in spleen and lung; however, the peak levels were similar for both  
379 wild type and total Bcl3 KO mice. Moreover, the increase in spleen was transient whereas in  
380 lung the increase was more sustained, persisting as late as 21 days post infection. In infected  
381 *Bcl3<sup>flx/flx</sup> Zbtb46 cre* mice, induction of both icDC1 and icDC2 cells was reduced on day 7 PI in  
382 both lung and spleen compared to results in wildtype control mice (**Fig. 4C and Fig. S7C**). In  
383 contrast, total cDC1 and cDC2 content in spleen and lung on day 7 post *T. gondii* infection was

384 not affected by specific deletion of Bcl3 in cDCs using the *Zbtb46* cre or in total KO (**Fig. 4D**  
385 **and Fig. S7D**).

386 These findings align with the RNA seq data where XCR1<sup>+</sup>Ly6C<sup>+</sup> and Ly6C<sup>+</sup>Sirpα<sup>+</sup> co-  
387 expressing cells are regulated by Bcl3 expression in *Zbtb46*<sup>+</sup> classical DCs.

388 **Defective antigen presentation and T cell priming in mice selectively deficient in Bcl3 in**  
389 **classical dendritic cells.**

390 To delineate the functional role of Bcl3 specifically in classical dendritic cells in the model, we  
391 compared antigen presentation and cytokine production by immune cells from wildtype and  
392 *Bcl3*<sup>flx/flx</sup> *Zbtb46* cre mice. To assess antigen presentation, MACS-purified CD11b<sup>+</sup> and XCR1<sup>+</sup>  
393 cells from naïve animals were pulsed with ova peptide or were infected in vitro with ova-  
394 expressing *T. gondii* tachyzoites, then were cocultured with OT-I CD8<sup>+</sup> T cells, which were  
395 assessed for proliferation (**Fig. S8A**).

396 CD11b<sup>+</sup> cells from wildtype and *Bcl3*<sup>flx/flx</sup> *Zbtb46* cre mice stimulated similar levels of OT-I T  
397 cell proliferation. In contrast, XCR1<sup>+</sup> DCs from wild type mice had far superior antigen-  
398 presenting activity (both for ova peptide and for naturally processed ova protein from ova-  
399 expressing *T. gondii*) compared to XCR1<sup>+</sup> DCs from *Bcl3*<sup>flx/flx</sup> *Zbtb46* cre mice, whose activity  
400 was close to background for the assay (**Fig. 5A, B**). This proves that XCR1<sup>+</sup> DCs are pivotal for  
401 cross-presentation of ova antigen and that Bcl3 regulates this function in this subset of DCs.

402 To assess cytokine induction by DCs in the model, we isolated splenocytes at day 18 PI from  
403 wildtype and *Bcl3*<sup>flx/flx</sup> *Zbtb46* cre mice, a timepoint when the adaptive immune response has  
404 begun in response to the infection. The T cells were stimulated ex vivo with plate-bound anti-  
405 CD3 and soluble anti-CD28. Intracellular IFN-γ and TNF-α levels were significantly reduced in

406 both CD4<sup>+</sup> and CD8<sup>+</sup> T cells from infected *Bcl3<sup>flx/flx</sup> Zbtb46 cre* mice compared to wild type  
407 mice. We also observed a significantly lower frequency of multifunctional IFN- $\gamma$ <sup>+</sup>TNF- $\alpha$ <sup>+</sup> CD4<sup>+</sup>  
408 and CD8<sup>+</sup> T cells among activated splenocytes from infected mice deficient in Bcl3 in classical  
409 DCs as compared with activated T cells from infected wildtype mice (**Fig. S8B, C; Fig. 5C**).

410 Similarly, when splenocytes were stimulated ex vivo with STAg to induce a *T. gondii*-specific  
411 response, we found that IFN- $\gamma$  levels were dramatically reduced in CD4<sup>+</sup> and CD8<sup>+</sup> T cells from  
412 infected *Bcl3<sup>flx/flx</sup> Zbtb46 cre* mice compared to T cells from infected wild type mice. STAg-  
413 stimulated TNF- $\alpha$  levels were also reduced in splenic T cells from infected *Bcl3<sup>flx/flx</sup> Zbtb46 cre*  
414 mice compared to wildtype controls, but only in CD4<sup>+</sup> T cells, not in CD8<sup>+</sup> T cells, whereas dual  
415 IFN- $\gamma$ <sup>+</sup>TNF- $\alpha$ <sup>+</sup> cells were reduced in both CD4<sup>+</sup> and CD8<sup>+</sup> T cell compartments after STAg  
416 stimulation of splenic T cells from infected *Bcl3<sup>flx/flx</sup> Zbtb46 cre* mice compared to wildtype  
417 controls (**Fig. S8B, C; Fig. 5D**). Consistent with these cDC Bcl3-dependent cytokine responses,  
418 in response to STAg stimulation of splenocytes, both CD4<sup>+</sup> and CD8<sup>+</sup> T cells from infected  
419 wildtype mice had significantly increased evidence of proliferation, as determined by Ki67  
420 staining, compared to cells from infected *Bcl3<sup>flx/flx</sup> Zbtb46 cre* mice (**Fig. S8D, Fig. 5E**).

421 To further examine the role of cDC Bcl3 in the *T. gondii*-specific immune response, we infected  
422 wildtype and *Bcl3<sup>flx/flx</sup> Zbtb46 cre* mice, isolated splenocytes 3 weeks PI and subsequently  
423 stained them for *T. gondii* tetramer-positive T cells. Both Tetramer<sup>+</sup>CD4<sup>+</sup> and Tetramer<sup>+</sup>CD8<sup>+</sup> T  
424 cell frequencies were much higher in splenocytes harvested from infected wildtype mice than in  
425 splenocytes from infected *Bcl3<sup>flx/flx</sup> Zbtb46 cre* mice, providing evidence for a pronounced  
426 antigen-specific Bcl3-dependent response (**Fig. S8E, Fig. 5F**). Splenocytes from day 21 PI were  
427 also stimulated with the *T. gondii* MHC-I-restricted peptide AS15 and the MHC-II-restricted  
428 peptide ROP5 for 4 hours. Intracellular IFN- $\gamma$  generation was significantly higher in peptide-

429 activated CD4<sup>+</sup> and CD8<sup>+</sup> T cells from wildtype mice compared to T cells from *Bcl3<sup>flx/flx</sup> Zbtb46*  
430 *cre* mice (**Fig. S8F, Fig. 5G**).

### 431 **Bcl3 promotes the development of classical dendritic cells**

432 After establishing a role for Bcl3 in classical DCs in the *T. gondii*-specific adaptive immune  
433 response, we next investigated whether Bcl3 might regulate cDC development. For this, we  
434 exploited an established bone marrow differentiation protocol in which a combination of Flt3L  
435 and NOTCH2 signaling is used for terminal differentiation of classical DC1, which are  
436 specialized for cross presentation. In this approach, murine bone marrow hematopoietic  
437 progenitors are cocultured with DL1 (NOTCH2 ligand)-expressing fibroblasts (OP9DL1 cells) in  
438 the presence of Flt3L. Unlike OP9 cells (DL1 negative fibroblasts), when cDC1 are  
439 differentiated in the presence of NOTCH signaling, they generate bona fide cDC1 with proper  
440 phenotypic markers (CD8 $\alpha$ <sup>+</sup>, Dec 205<sup>+</sup>) and better T cell cross priming potential. We used this  
441 approach to differentiate bone marrow cells in vitro from uninfected wildtype and *Bcl3<sup>-/-</sup>* mice  
442 (**Fig. S9A, Scheme**). We found that coculture with OP9 fibroblasts generated a small proportion  
443 of cells expressing CD24 and XCR1, which are markers for cross-presenting cDC1s, however  
444 this is not affected by Bcl3 deficiency or IFN- $\gamma$  addition to the culture system. (**Fig. S9B**).

445 However, when differentiated in the presence of DL1 (OP9DL1 fibroblasts), wildtype bone  
446 marrow developed cells expressing both cDC1 markers. In contrast, bone marrow from Bcl3-  
447 deficient mice cocultured with OP9-DL1 fibroblasts generated cells with lower levels of  
448 expression of CD24 and XCR1 (**Fig. 6A**).

449 IFN- $\gamma$  is also a critical regulator of DC differentiation and is strongly induced during *T. gondii*  
450 infection. Therefore, we tested its ability to modulate cDC1 development in our coculture system  
451 as a function of Bcl3 expression. For this, we added exogenous IFN- $\gamma$  to a 7 Day old coculture

452 for an additional 2 days. IFN- $\gamma$  alone in the absence of NOTCH2 signaling but in the presence of  
453 Flt3L signaling did not affect the level of cDC1 differentiation observed in cocultures of bone  
454 marrow from wildtype or *Bcl3*<sup>-/-</sup> mice. However, in the presence of NOTCH2 signaling, IFN- $\gamma$   
455 significantly increased CD24- and XCR1-expressing cells differentiated from wildtype bone  
456 marrow, but not from Bcl3-deficient bone marrow (**Fig. 6A, right panel**). Thus, IFN- $\gamma$  and  
457 NOTCH2 cannot compensate for Bcl3 deficiency for the generation of immunophenotypically  
458 defined cDC1s. To test Bcl3 regulation of cDC1 function in this system, we either pulsed the  
459 bone marrow-differentiated DCs with ova peptides or infected them in vitro with ova-expressing  
460 *T. gondii*. Subsequently, they were cocultured with CD8<sup>+</sup> OT-I T cells whose proliferation was  
461 monitored. In the absence of NOTCH2 signaling, ova stimulation only slightly increased APC  
462 function, with wildtype DC activity greater than activity for *Bcl3*<sup>-/-</sup> -derived DC (**Fig. 6B, upper**  
463 **panel**). In the presence of NOTCH signaling, cross presentation is substantially improved in the  
464 system for wild type DCs, but not for Bcl3-deficient DCs (**Fig. 6B, lower panel**).

465

## 466 **Discussion**

467 In the present study, we have demonstrated that mice lacking the NF- $\kappa$ B regulator Bcl3 in cells  
468 expressing Zbtb46, a selective immune cell marker of cDCs, uniformly succumb 3-5 weeks after  
469 intraperitoneal infection with *T. gondii*. Infected *Bcl3<sup>flx/flx</sup> Zbtb46 cre* mice failed to clear the  
470 parasite in brain, spleen and lung and had impaired Th1 immune responses, with reduced  
471 production of the critical macrophage-activating cytokine IFN- $\gamma$  from antigen-specific CD4<sup>+</sup> and  
472 CD8<sup>+</sup> T cells in the adaptive phase of the infection, as early as 18 days PI. These results extend  
473 our previous report of *T. gondii* outcome in global Bcl3 knockout mice and mice conditionally  
474 deficient in Bcl3 in cells expressing CD11c, which include all subsets of DCs as well as multiple  
475 other immune cells, including neutrophils, NK cells, NKT cells, B cells, monocytes and  
476 macrophages [9, 13]. At the clinical level, we found that survival kinetics were the same for  
477 *Bcl3<sup>flx/flx</sup> Zbtb46 cre* mice as for total Bcl3 KO mice, defining Bcl3 expression specifically in  
478 cDCs as a key survival factor. While our study does not address or exclude a role for Bcl3 in  
479 *Toxoplasma* susceptibility in other Bcl3-expressing CD11c<sup>+</sup> cell types, it did allow us to focus  
480 our attention on the specific mechanistic role of cDC Bcl3 in the model.

481 Dendritic cells act as a key player in host defense against *Toxoplasma* infection. After initial  
482 encounter by the parasite, *Toxoplasma*-infected and bystander DCs produce IL-12 along with  
483 macrophages and monocytes, with neutrophils contributing to a lesser extent. IL-12 is pivotal for  
484 generating a Th1 immune response with early innate production of IFN- $\gamma$  by natural killer (NK)  
485 cells in the acute phase and later by CD4<sup>+</sup> T cells in the adaptive phase and CD8<sup>+</sup> T cells in the  
486 chronic phase [17, 29, 30]. Inflammatory mediators such as nitric oxide are under direct control  
487 of IFN- $\gamma$  [31]. Bcl3 deficiency impairs IFN- $\gamma$ -inducible nitric oxide generation, thereby allowing  
488 prolonged parasite survival in the peripheral organs and brain.

489 *T. gondii* enters the dendritic cell by active invasion and is sequestered in specialized  
490 compartments called parasitophorous vacuoles [32]. Several studies have demonstrated that the  
491 parasite can be detected by the immune system using the MHC I-mediated endogenous pathway  
492 of professional APCs in cross priming CD8<sup>+</sup> T cells in the chronic phase of the infection [33]  
493 XCR1<sup>+</sup> classical DCs are mediators of cross presentation in mouse and human [34]. In this  
494 regard, our previously published work on Bcl3 function in DCs was limited to analysis of 7-9  
495 day in vitro GM-CSF-stimulated bone marrow-derived CD11b<sup>+</sup> CD11c<sup>+</sup> dendritic cells  
496 (BMDCs), in which Bcl3 deficiency reduced BMDC maturation and survival after ovalbumin  
497 antigen/adjuvant challenge as well as BMDC priming of OT-II CD4<sup>+</sup> T cells and cross priming  
498 of OT-I CD8<sup>+</sup> T cells both in vitro and, in adoptive transfer experiments, in vivo [11]. Also, our  
499 previously published immunologic analysis of the effects of Bcl3 deficiency in the toxoplasmosis  
500 challenge model was limited to demonstrating that IFN- $\gamma$  production from NK cells during the  
501 early innate immune response was normal in *T. gondii*-infected global *Bcl3*<sup>-/-</sup> and *Bcl3*<sup>flx/flx</sup>  
502 *CD11c cre mice* (CD11c Cre-driven deletion) and that accumulation of IFN- $\gamma$ -producing CD4<sup>+</sup>  
503 and CD8<sup>+</sup> T cells in spleen was reduced at day 18 PI [6].

504 Our present results extend these precedents in two ways. First, we directly examined the Bcl3  
505 dependence of *T. gondii* antigen-specific T cell responses in primary splenocytes. Here we  
506 employed *T. gondii*-specific tetramer staining and intracellular IFN- $\gamma$  generation following *T.*  
507 *gondii*-specific peptide stimulation ex vivo. Proliferation of these activated T cells was  
508 monitored by Ki67 staining. And second, we used single cell RNAseq technology to describe  
509 heterogeneous cDC subsets at the molecular level that are induced by *T. gondii* in the spleens of  
510 infected mice in a cDC Bcl3-dependent manner.



511 With regard to antigen presentation and T cell activation, we found that 1) *T. gondii* infection  
512 resulted in much lower serum levels of both IFN- $\gamma$  and IL-12 in cDC Bcl3-deficient mice; 2) the  
513 production of IFN- $\gamma$ , IL-12 and nitric oxide induced by STAg stimulation in vitro of whole  
514 splenocytes harvested at day 7 PI was markedly reduced in cDC Bcl3-deficient mice; 3) Bcl3  
515 was required for normal cross presentation of antigen by XCR1<sup>+</sup> cDC1s to OT-I CD8<sup>+</sup> T cells  
516 (both for exogenous ova peptide or naturally processed ova protein from ova-expressing *T.*  
517 *gondii* after infection); however presentation by CD11b<sup>+</sup> cells, consisting of cDC2, monocytes,  
518 monocyte-derived DC and macrophages remained essentially intact; 4) at day 18 PI, a timepoint  
519 when the *T. gondii*-specific adaptive immune response is well-established, splenic CD4<sup>+</sup> and  
520 CD8<sup>+</sup> T cells from cDC Bcl3-deficient mice had reduced levels of intracellular IFN- $\gamma$  and TNF- $\alpha$   
521 and a lower frequency of multifunctional IFN- $\gamma$ <sup>+</sup>TNF- $\alpha$ <sup>+</sup> cells after stimulation *ex vivo* with anti-  
522 CD3 and anti-CD28, as well as impaired STAg-induced CD4<sup>+</sup> and CD8<sup>+</sup> T cell proliferation and  
523 IFN- $\gamma$  production; and 5) in splenocytes harvested at day 21 PI from cDC Bcl3-deficient mice  
524 there were reduced frequencies of *T. gondii* tetramer-positive CD4<sup>+</sup> and CD8<sup>+</sup> T cells and  
525 reduced intracellular IFN- $\gamma$ -positive CD4<sup>+</sup> and CD8<sup>+</sup> T cells after stimulation with the *T. gondii*  
526 MHC-II-restricted peptide AS15 and the MHC-I-restricted peptide ROP5. Together, the data  
527 provide evidence that Bcl3 expression in cDCs is critical for antigen-specific T cell responses,  
528 including responses to *T. gondii* antigens in vivo. Moreover, the data confirm that XCR1<sup>+</sup>  
529 cDC1s are pivotal for cross-presentation of antigen and demonstrate that Bcl3 regulates this  
530 function in the context of *T. gondii* infection. How Bcl3 exclusively regulates antigen  
531 presentation in cDC1s and not antigen presentation in CD11b<sup>+</sup> cells, consisting of monocytes,  
532 macrophages and cDC2s (including MoDCs) is an open question revealed by our study worthy  
533 of future investigation.

534 Dendritic cells are extremely heterogeneous in terms of their phenotype and functions. They  
535 form organ-specific subsets with diversity in surface markers, migratory patterns, localization,  
536 and cytokine production. The development of diverse populations of DCs is differentially  
537 regulated by differentially expressed transcription factors and cytokines [18]. Furthermore,  
538 several studies have been reported describing the emergence of nonconventional dendritic cells  
539 with distinct immunological roles. Inflammatory cDC2 acquire CD64, a macrophage marker and  
540 express cDC1-specific Irf8 in lungs of mice infected with the single-stranded RNA virus  
541 pneumonia virus of mice (PVM), a virus closely related to human respiratory syncytial virus  
542 (RSV) [35]. Type I IFN-induced CD64<sup>+</sup> cDCs have also been described in the context of *Listeria*  
543 infection [36]. Even under steady state conditions, classically defined cDC2s contain a discrete  
544 population of apparent monocyte-derived cells capable of DC function, including cross-  
545 presentation [37]. Further, tumor immunotherapy using a PTEN inhibitor (vanadate drug VO-  
546 OHpic) has been reported to induce the generation of Batf3-dependent, CD103<sup>+</sup> Ly6C<sup>+</sup> cross-  
547 presenting cells arising from an immature monocytic precursor present in the peripheral MDSC  
548 pool [38]. In our study, we revisited the concept of dendritic cell heterogeneity under a similar  
549 IFN- $\gamma$  induced inflammatory milieu in *T. gondii* infection. We could demonstrate from scRNA  
550 seq analysis that *T. gondii*-infected spleen contains a hybrid DC with dual expression of Zbtb46  
551 and LysM, the signature transcription factors for classical DCs and monocytic cells, respectively.  
552 To our knowledge, this is the first report for the existence of such a unique subpopulation. We  
553 found a small population of these cells in naïve uninfected wildtype mice which cluster closely  
554 with cells phenotypically defined as cDC1. However, after infection, these cells were distributed  
555 in all subclusters of cDC1s and cDC2s. Since the lifespan of DCs is 10-14 days and since they  
556 are constantly replenished by BM precursors, we speculate that special precursor cells are

557 generated and expanded under inflammatory pressure. *Zbtb46* is expressed by the immediate  
558 precursor of cDCs (precDC1 and precDC2), but not in early and intermediate DC progenitors  
559 [39]. Hence, the Bcl3-specific defect cannot be traced back to MDP or CDP differentiation.

560 We confirmed the existence of these ‘hybrid’ cells by flow cytometry as CD11c<sup>hi</sup>MHC

561 II<sup>hi</sup>CD24<sup>+</sup>CD8<sup>+</sup>XCR1<sup>+</sup>CD64<sup>+</sup>Ly6C<sup>+</sup> cells and CD11c<sup>hi</sup>MHC

562 II<sup>hi</sup>CD24<sup>+</sup>CD11b<sup>+</sup>/Sirpa<sup>+</sup>CD64<sup>+</sup>Ly6C<sup>+</sup> cells, which we refer to as inflammatory cDC1 (icDC1)

563 and inflammatory cDC2 (icDC2) cells, respectively. Interestingly, both icDC1 and icDC2 are

564 reduced in both frequency and absolute number in both lung and spleen from infected *Bcl3*<sup>-/-</sup>

565 mice and *Bcl3*<sup>flx/flx</sup> *Zbtb46* *cre* mice. How Bcl3 is regulating the generation of these subsets is

566 beyond the scope of the present work; however, we speculate that development of icDC1 and

567 icDC2 during infection might provide a Tip-DC-like function in otherwise conventional DCs that

568 might support T cell priming and TNF- $\alpha$  and nitric oxide generation [40].

569 Previous studies on host transcriptomics have revealed a general host-pathogen interaction in an

570 in vitro *T. gondii* infection model [41] and in cat intestine [42]. To our knowledge, our study

571 provides the first single cell transcriptomic investigation of dendritic cell Bcl3 in an experimental

572 murine model of Toxoplasmosis. Since antigen presentation is a professional function of

573 classical DCs and is regulated by Bcl3, we focused on genes known to affect this function.

574 Overall, MHC expression was not affected by Bcl3 deficiency, whereas proteosomal genes and

575 genes involved in antigen processing were most highly dependent on Bcl3 for upregulation

576 during infection. We also identified Bcl3-dependent genes involved in apoptosis, cell migration

577 and inflammation, which showed distinct expression patterns in mice with different genotypes

578 and under different experimental conditions.

579 cDC development from BM progenitors is mainly driven by Flt3L. Interestingly, NOTCH  
580 signaling along with Flt3L results in exclusive generation of cDC1 with distinct phenotypic  
581 markers and enhanced T cell priming capacity [43]. We found that in vitro differentiation of BM  
582 cells from Bcl3-deficient mice to XCR1<sup>+</sup>CD24<sup>+</sup> cDC1 in response to NOTCH/Flt3L stimulation  
583 was defective and could not be rescued by addition of exogenous IFN- $\gamma$ . Thus, Bcl3 deficiency  
584 may cause an intrinsic defect in pre-cDC1. Additionally, these in vitro generated cDC1 are less  
585 potent in presenting antigen (both ova peptide and ova protein in the context of *T. gondii*) to  
586 CD8<sup>+</sup> OT-I T cells than wildtype control cDC1.

587 In conclusion, our study establishes a role for Bcl3 in development of cDCs in the context of *T.*  
588 *gondii* infection and inflammation, including confirmation of novel inflammatory cDC subsets  
589 defined by transcriptomic and immunophenotypic criteria. We have extended our previous  
590 studies of Bcl3 in toxoplasmosis by assigning a specific role of cDC antigen cross presentation  
591 and CD8<sup>+</sup> T cell activation. Finally, our single cell RNAseq data suggest that the effect of Bcl3  
592 deficiency in cDC gene expression in the model includes major effects on antigen processing  
593 genes, which provide new and testable hypotheses for future studies of the functional role of  
594 Bcl3 in toxoplasmosis.

595

## 596 **Materials and Methods**

597 **Ethics statement:** All animal handling procedures and experiments were approved by the  
598 NIAID Animal Care and Use Committee (protocol LMI-23E) and were conducted in accordance  
599 with all relevant institutional guidelines.

600 **Mice:** *Bcl3*<sup>-/-</sup> mice [9] and *Bcl3*<sup>flx/flx</sup> mice [11] were generated in our laboratory and previously  
601 described. *Zbtb46* cre mice was a kind gift from Dr. Michel Nussenweig [39]. *Bcl3*<sup>flx/flx</sup> *Zbtb46*  
602 *cre* mice (Bcl-3 knockout in classical dendritic cells) were generated by crosses of *Bcl3*<sup>flx/flx</sup> and  
603 *Bcl3*<sup>KO/flx</sup> mice carrying the *Zbtb46*-driven Cre recombinase transgene. All the Bcl3 sufficient  
604 controls were littermates. *Bcl3*<sup>-/-</sup> (Taconic line 74), WT (Taconic line) and OT-I mice (Taconic  
605 line 175) were purchased from Taconic Biosciences (Germantown, NY, USA). All mice were  
606 based on the C57BL/6 background. All mice were housed in NIAID Institute facilities.

607 **Parasite:** The ME49 strain of *T. gondii* was maintained in wildtype C57BL/6 mice by  
608 intraperitoneal injection (15 cysts/mice). After 30 days mice were sacrificed, and brain cysts  
609 were isolated and reinfected into naïve animals. Rh and Rh-ova-Td tomato tachyzoites were  
610 maintained in Hs27 cells (human foreskin fibroblasts). Confluent monolayer cells were infected  
611 with the tachyzoite form of the parasite at an M.O.I of 1:10. After 72-96 hours, the cells burst  
612 due to the parasite load. The tachyzoites were collected and reinfected into fresh cells.

613 **Cells:** Hs27 cells were maintained in DMEM medium supplemented with 10% FCS. OP9 and  
614 OP9-DL1 (expressing NOTCH ligand DL1) cells (macrophage derived ESC from bone marrow)  
615 were maintained in Alpha minimum essential medium supplemented with 2.2 g/L sodium  
616 bicarbonate and 20% FCS.

617 **Infection and survival kinetics:** For experimental infections, mice were inoculated i.p. with an  
618 average of 15 cysts/animal and monitored for survival and weight change.

619 **Genomic DNA isolation and B1 gene PCR:** Organ sections were collected from infected mice  
620 at the indicated times and genomic DNA was isolated using the DNeasy Blood and tissue kit  
621 (Qiagen, Cat. No: 69504). The B1 gene from *T. gondii* was amplified and organ parasite load  
622 was determined using a standard curve [44]. 500 ng of genomic DNA was used in a SYBR  
623 green- (Cat no. A25776, Applied Biosystem, Thermo Fisher Scientific Waltham, MA USA)  
624 based real time PCR reaction in Quantstudio 3 (Applied Biosystems) using the Standard curve  
625 with Melt protocol.

626 **Forward primer:** F 5`-CTC CTT CGT CCG TCG TAA TAT C-3`

627 **Reverse primer:** R 5`-TGG TGT ACT GCG AAA ATG AAT C-3`

628 Cycling conditions: UDG activation, 50°C, 2'; Initial denaturation, 95°C, 10' followed by 40  
629 cycles of 95°C, 30''; 62°C, 40''; and 72°C, 1'; Final extension, 72°C, 5'; Melt curve, 95°C  
630 (1.6°C/sec), 15''; 60°C (1.6°C/sec), 15''.

631 **Bcl3 PCR in classical DC:**

632 Spleen cells were isolated from *Bcl3<sup>flx/flx</sup>* and *Bcl3<sup>flx/flx</sup> Zbtb46 cre* mice and CD11c cells were  
633 sorted using CD11c MicroBeads (Miltenyi Biotec, Cat# 130-125-835) according to the  
634 manufacturer's instructions. Next *Zbtb46<sup>+</sup>* cells (cDC) and *Zbtb46<sup>-</sup>* cells (non cDC,  
635 *CD11c<sup>+</sup>Zbtb46<sup>-</sup>*) were FACS sorted after intracellular staining. T cells (Miltenyi Biotec, Cat#  
636 130-095-130) were isolated as controls. PCR was performed using the primer sets for floxed and  
637 KO alleles:

638 KO Forward: 5' GCGCCGCCCCGACTGAC 3'

639 Floxed Forward: 5' CGTCCCCAGAGCCCGCAACCAC 3'

640 Reverse (common): 5'GGGCCTCTCAACCTCTTTCCTA 3'

641 Zbtb46 cre PCR was performed according to the Jackson Laboratory protocol (Stock Number:  
642 028538)

643 **Serum Cytokines:** Mice were sacrificed at day 0, day 7 and day 21 post infection and blood was  
644 collected. Serum was isolated by centrifugation and stored at -80°C. Serum was diluted if  
645 necessary and IFN- $\gamma$  (1:100) and IL-12 (1:50) were measured by ELISA using a BD Biosciences  
646 kit, (BD OptEIA™ Mouse IFN- $\gamma$  (AN-18) ELISA Set, Cat#551866; BD OptEIA™ Mouse IL-12  
647 p40 ELISA Set, Cat # 555165) according to the manufacturer's protocol.

648 **Ex vivo stimulation:** Total splenocytes were isolated from uninfected mice and mice 7 days pi.  
649  $4 \times 10^6$  cells were stimulated ex vivo by 5  $\mu$ g/ml of soluble toxoplasma antigen (STAg) for 72 h.  
650 Culture supernatants were collected and extracellular cytokines were measured using an ELISA  
651 kit from BD Biosciences. Nitric oxide was measured using the Griess reagent system from  
652 Invitrogen (Cat #G7921).

653 **Histology:** Organs were immersion-fixed in 10% buffered formalin and embedded in paraffin  
654 blocks. Sections were stained with hematoxylin and eosin (H&E) and examined by light  
655 microscopy.

656 **Ag presentation:** For measuring direct antigen presentation,  $5 \times 10^4$  Splenic DC (XCR1<sup>+</sup> DC,  
657 isolated using the Anti-XCR1 MicroBead Kit (Spleen), mouse, Cat no. 130-115-721, Miltenyi  
658 Biotech or CD11b<sup>+</sup> cells isolated using CD11b MicroBeads UltraPure, mouse, Cat no. 130-126-

659 725, Miltenyi Biotech) or BMDCs were stimulated for 3 h using Ova peptide 257–264  
660 (SIINFEKL) (Cat no. AS-60193-5, AnaSpec, Fremont, CA, USA). For measuring antigen cross  
661 presentation, the cells were infected in vitro with Ova-expressing Rh tachyzoites (Ova-Rh-td-  
662 tomato) at an MOI of 1:10 for 24 h. The cells were washed and cocultured with  $2.5 \times 10^5$  Cell  
663 Tracer Violet (Cat no. C34557 A, Invitrogen)-loaded CD8<sup>+</sup> OT-I cells (isolated using CD8a<sup>+</sup> T  
664 Cell Isolation Kit, mouse, Cat no. 130-104-075, Miltenyi Biotech) for 72 h. Subsequently the  
665 proliferation profile of the OT-I cells was determined by Flow cytometry.

666 **Tetramer staining and intracellular cytokine determination:** Splenocytes were isolated from  
667 mice 18 days PI and stained with ROP5-MHC-I tetramer and AS15-MHC-II tetramer  
668 (*Toxoplasma gondii* specific tetramers, synthesized by the NIAID, NIH tetramer core facility,  
669 Atlanta, GA, USA) [45, 46] at room temperature and 4°C, respectively, for 1 hour. Dead cells  
670 were stained with Live/Dead Aqua (Cat no. L34966, Life Technologies Corporation, Eugene,  
671 OR, USA) along with surface antibodies. To determine intracellular cytokine production from  
672 CD4<sup>+</sup>/CD8<sup>+</sup> T cells, splenocytes were isolated from 18-day infected mice and stimulated with  
673 plate-bound anti-CD3ε (Clone 145-2C11, 2 µg/mL) and soluble αCD28 (Clone 37.51, 1 µg/mL)  
674 (both from BioXcell, West Lebanon, NH, USA) for 6 h, or STAg (5 µg/ml) for 72 h, or the  
675 *Toxoplasma* specific peptides AS15 and ROP5 (custom made, Genscript) for 4 hours. Cells were  
676 cultured in the presence of a protein transport inhibitor cocktail (Cat no. 00-4980-93,  
677 eBioscience; Thermo Fisher Scientific, Carlsbad, CA, USA) for the last 4 hr. Cells were stained  
678 with Live/Dead Aqua and cell surface markers, fixed and permeabilized and finally stained for  
679 intracellular cytokines at 4°C using antibodies listed in Table 1 (Supplementary information).

680 **In vitro BMDC differentiation:** Single cell suspensions were generated from wildtype and  
681 Bcl3 KO BM cells. The cells were suspended in DMEM medium supplemented with 10% FCS,



682 1% L-glutamine, 1% sodium pyruvate, 1% MEM-NEAA and 1% penicillin/streptomycin, 55  
683 mM 2-mercaptoethanol and Flt3L (100 ng/ml) (Cat no. RP-8665, Invitrogen, Thermo Fischer  
684 Scientific) and cultured at 37°C in a humidified atmosphere at 5% CO<sub>2</sub>. On day 3, the cells were  
685 transferred to a single well containing a monolayer of mitomycin C (Cat no. 50-07-7, Millipore  
686 Sigma, Merck, Darmstadt, Germany)-treated OP9/ OP9-DL1 cells or were kept unaltered. At  
687 Day 7, the cells were supplemented with murine rIFN- $\gamma$  (40  $\mu$ g/ml) (Recombinant Murine IFN- $\gamma$ ,  
688 Catalog Number:315-05, Peprotech) or were kept unaltered. At Day 9, all the cells were  
689 harvested and used for DC phenotyping by Flow cytometry or were used further in the antigen  
690 presentation assay described above.

#### 691 **CD11c<sup>+</sup> splenocyte isolation for single-cell RNA sequencing and library preparation**

692 Single cell suspensions of splenocytes were enriched for CD11c<sup>+</sup> cells using CD11c MicroBeads  
693 (Miltenyi Biotec, Cat# 130-125-835) according to the manufacturer's instructions. The  
694 downstream procedures of single-cell RNA-seq library preparation from the CD11c-enriched  
695 single cells and library sequencing were performed by the Single Cell Analysis Facility (SCAF)  
696 of the National Cancer Institute (NCI) Center for Cancer Research. scRNA-seq libraries were  
697 prepared using the Chromium Single Cell 3' Reagent Kits v3.1 (10X Genomics; Pleasanton, CA,  
698 USA) according to the manufacturer's instructions. Generated libraries were sequenced on an  
699 Illumina NextSeq 2000 instrument, followed by de-multiplexing and mapping to the mouse  
700 genome (mm10: refdata-gex-mm10-2020-A) using cellranger (10X Genomics, version 4.0.0).

701 **This dataset is available at GEO Series accession number GSE193532**

702 **(<https://www.ncbi.nlm.nih.gov/geo/query/acc.cgi?acc=GSE193532>).**

703

## 704 **scRNA-seq data analysis**

705 Gene expression matrices were generated using cellranger (10X Genomics, version 4.0.0) and  
706 the raw matrices were further processed using the Seurat package (4.0.1) [47] in R (version  
707 4.0.5). For quality control, the following categories were excluded from the analysis: (i) genes  
708 expressed by fewer than 3 cells; (ii) cells with lower than 200 or more than 6000 genes detected;  
709 (iii) cells in which >20% of unique molecular identifiers (UMIs) were derived from the  
710 mitochondrial genome. To align shared cell populations across datasets, multiple experimental  
711 single-cell datasets were integrated using the “anchoring” strategy to remove batch effects. This  
712 involved combining multiple datasets and normalizing them and finding highly variable features  
713 individually using “NormalizeData” and “FindVariableFeatures” functions respectively from  
714 Seurat package. Common features that repeatedly vary across datasets (determined using  
715 “FindIntegrationAnchors” function) were used as integration anchors for integrating multiple  
716 datasets using “IntegrateData” function from Seurat. Integrated dataset was scaled and clustered  
717 using Louvain algorithm (resolution = 0.3). Dimensionality reduction was performed using  
718 Principal Component Analysis (PCA, n=30), t-stochastic neighboring embedding (t-SNE) and  
719 Uniform Manifold Approximation and Projection (UMAP) for visualization. Transcriptomic  
720 mouse datasets from the Immgen database [26] were used for reference-based cell type  
721 annotation using SingleR (v1.0.5) [25]. From the auto-annotated data, only cells identified as  
722 dendritic cells or macrophages were selected and data was re-normalized and re-clustered for  
723 finer analyses. Cluster size was depicted as its proportion within a group and the significance of  
724 the difference between the proportion of cells in clusters between groups was calculated using  
725 scProportionTest (v1.0.0) package. Differentially expressed genes (DEGs) between clusters were  
726 calculated using “FindAllMarkers” or “FindMarker” functions by Wilcoxon rank sum test

727 (default) from Seurat. To maximize the visualization of DEGs between clusters or experimental  
728 groups, we used the “AverageExpression” function within Seurat. Gene clustering for heatmap  
729 visualization was performed by hierarchical clustering (the “hclust” function from stats package  
730 (v3.6.2) using either ‘complete’ or ‘ward.D2’ methods). To overcome the dropout effect in single  
731 cell data, we used the MAGIC package (2.0.3) [48] with the default setting (knn = 5, decay = 1)  
732 in supplementary figures. To sort out dual-positive or hybrid cells by the expression of *Zbtb46*,  
733 *Lyz2*, *Ly6c2*, *Xcr1* and *Sirpa*, the normalized gene count matrix was extracted from the Seurat  
734 object using the “GetAssayData” function and the cells with > 0.2 normalized gene expression  
735 value considered as positive. Functional enrichment analysis was performed through Ingenuity  
736 Pathway Analysis.

737 **Immune cell staining:** Cells from naïve or infected mice at the indicated time intervals were  
738 collected from lung or spleen and separate panels of antibodies were used for  
739 immunophenotyping as listed in Table1 (Supplementary information).

740 **Statistical analysis:** Data were recorded as the mean  $\pm$ SEM. Differences between groups were  
741 analyzed by unpaired, two-tailed Student’s t-tests. Results with a p value of 0.05 or less were  
742 considered significant (Prism; GraphPad Software). Survival studies were analyzed by the log-  
743 rank Mantel-Cox test. The number of independent data points (n) and the number of independent  
744 experiments is stated in figure legends.

745 **Acknowledgements:** This research was supported by the Intramural Research Program of  
746 the National Institute of Allergy and Infectious Diseases, National Institutes of Health, Bethesda,  
747 MD. We thank Dragana Lj Jankovic for kindly providing the *Toxoplasma gondii* (ME49) cysts,  
748 Rh Tachyzoites and Hs27 cells; Ian Moore for helping with the Histological studies; Michel

749 Nussenzweig for kindly providing the Zbtb46 cre mice; Christopher A. Hunter for providing the  
750 ova-Rh-td-tomato tachyzoites; and Michael Kelly for help with scRNA library preparation and  
751 sequencing. Support from the CCR Single Cell Analysis Facility was funded by FNLCR  
752 Contract HHSN261200800001E. This work utilized the computational resources of the NIH  
753 HPC Biowulf cluster (<http://hpc.nih.gov>). Finally, we thank the NIH tetramer facility for  
754 preparing the Toxoplasma tetramers.

## 755 **Supporting Information caption**

756 **S1 Fig:** Genotyping and brain parasite load

757 **S2 Fig:** Immune response and histopathology

758 **S3 Fig:** Immune cell distribution in naïve mice

759 **S4 Fig:** Preprocessing of scRNAseq data and identification of cells predicted by unsupervised  
760 clustering

761 **S5 Fig:** DC distribution is significantly influenced by Bcl3 deficiency in the context of *T. gondii*  
762 infection

763 **S6 Fig:** Characterization of Hybrid cell from scRNA seq results in spleen

764 **S7 Fig:** Generation of hybrid conventional DCs in *T. gondii*-infected lung

765 **S8 Fig:** Schematics of Antigen presentation assay and Dot plots of Intracellular cytokine staining

766 **S9 Fig:** Schematics of invitro BMDC differentiation and immunophenotyping

767

768

769 **Reference**

- 770 1. Hayden MS, Ghosh S. Shared principles in NF-kappaB signaling. *Cell*. 2008;132(3):344-  
771 62. Epub 2008/02/13. doi: 10.1016/j.cell.2008.01.020. PubMed PMID: 18267068.
- 772 2. Oeckinghaus A, Ghosh S. The NF-kappaB family of transcription factors and its  
773 regulation. *Cold Spring Harb Perspect Biol*. 2009;1(4):a000034. Epub 2010/01/13. doi:  
774 10.1101/cshperspect.a000034. PubMed PMID: 20066092; PubMed Central PMCID:  
775 PMCPMC2773619.
- 776 3. Schuster M, Annemann M, Plaza-Sirvent C, Schmitz I. Atypical IkappaB proteins -  
777 nuclear modulators of NF-kappaB signaling. *Cell Commun Signal*. 2013;11(1):23. Epub  
778 2013/04/13. doi: 10.1186/1478-811X-11-23. PubMed PMID: 23578005; PubMed Central  
779 PMCID: PMCPMC3639191.
- 780 4. Ohno H, Takimoto G, McKeithan TW. The candidate proto-oncogene bcl-3 is related to  
781 genes implicated in cell lineage determination and cell cycle control. *Cell*. 1990;60(6):991-7.  
782 Epub 1990/03/23. doi: 10.1016/0092-8674(90)90347-h. PubMed PMID: 2180580.
- 783 5. Bours V, Franzoso G, Azarenko V, Park S, Kanno T, Brown K, et al. The oncoprotein  
784 Bcl-3 directly transactivates through kappa B motifs via association with DNA-binding p50B  
785 homodimers. *Cell*. 1993;72(5):729-39. Epub 1993/03/12. doi: 10.1016/0092-8674(93)90401-b.  
786 PubMed PMID: 8453667.
- 787 6. Franzoso G, Bours V, Park S, Tomita-Yamaguchi M, Kelly K, Siebenlist U. The  
788 candidate oncoprotein Bcl-3 is an antagonist of p50/NF-kappa B-mediated inhibition. *Nature*.  
789 1992;359(6393):339-42. Epub 1992/09/24. doi: 10.1038/359339a0. PubMed PMID: 1406939.
- 790 7. Zhang X, Wang H, Claudio E, Brown K, Siebenlist U. A role for the IkappaB family  
791 member Bcl-3 in the control of central immunologic tolerance. *Immunity*. 2007;27(3):438-52.

- 792 Epub 2007/09/18. doi: 10.1016/j.immuni.2007.07.017. PubMed PMID: 17869136; PubMed  
793 Central PMCID: PMCPMC2000815.
- 794 8. Claudio E, Brown K, Siebenlist U. NF-kappaB guides the survival and differentiation of  
795 developing lymphocytes. *Cell Death Differ.* 2006;13(5):697-701. Epub 2006/03/11. doi:  
796 10.1038/sj.cdd.4401894. PubMed PMID: 16528380.
- 797 9. Franzoso G, Carlson L, Scharton-Kersten T, Shores EW, Epstein S, Grinberg A, et al.  
798 Critical roles for the Bcl-3 oncoprotein in T cell-mediated immunity, splenic microarchitecture,  
799 and germinal center reactions. *Immunity.* 1997;6(4):479-90. Epub 1997/04/01. doi:  
800 10.1016/s1074-7613(00)80291-5. PubMed PMID: 9133427.
- 801 10. Jaiswal H, Ciucci T, Wang H, Tang W, Claudio E, Murphy PM, et al. The NF-kappaB  
802 regulator Bcl-3 restricts terminal differentiation and promotes memory cell formation of CD8+ T  
803 cells during viral infection. *PLoS Pathog.* 2021;17(1):e1009249. Epub 2021/01/29. doi:  
804 10.1371/journal.ppat.1009249. PubMed PMID: 33508001; PubMed Central PMCID:  
805 PMCPMC7872245 Siebenlist was unable to confirm their authorship contributions. On their  
806 behalf, the corresponding author has reported their contributions to the best of their knowledge.
- 807 11. Tassi I, Claudio E, Wang H, Tang W, Ha HL, Saret S, et al. The NF-kappaB regulator  
808 Bcl-3 governs dendritic cell antigen presentation functions in adaptive immunity. *J Immunol.*  
809 2014;193(9):4303-11. Epub 2014/09/24. doi: 10.4049/jimmunol.1401505. PubMed PMID:  
810 25246497; PubMed Central PMCID: PMCPMC4201953.
- 811 12. Pene F, Paun A, Sonder SU, Rikhi N, Wang H, Claudio E, et al. The IkappaB family  
812 member Bcl-3 coordinates the pulmonary defense against *Klebsiella pneumoniae* infection. *J*  
813 *Immunol.* 2011;186(4):2412-21. Epub 2011/01/14. doi: 10.4049/jimmunol.1001331. PubMed  
814 PMID: 21228348; PubMed Central PMCID: PMCPMC3163503.

- 815 13. Tassi I, Claudio E, Wang H, Tang W, Ha HL, Saret S, et al. Adaptive immune-mediated  
816 host resistance to *Toxoplasma gondii* is governed by the NF-kappaB regulator Bcl-3 in dendritic  
817 cells. *Eur J Immunol*. 2015;45(7):1972-9. Epub 2015/04/18. doi: 10.1002/eji.201445045.  
818 PubMed PMID: 25884683.
- 819 14. Hill D, Dubey JP. *Toxoplasma gondii*: transmission, diagnosis and prevention. *Clin*  
820 *Microbiol Infect*. 2002;8(10):634-40. Epub 2002/10/23. doi: 10.1046/j.1469-0691.2002.00485.x.  
821 PubMed PMID: 12390281.
- 822 15. Pappas G, Roussos N, Falagas ME. Toxoplasmosis snapshots: global status of  
823 *Toxoplasma gondii* seroprevalence and implications for pregnancy and congenital  
824 toxoplasmosis. *Int J Parasitol*. 2009;39(12):1385-94. Epub 2009/05/13. doi:  
825 10.1016/j.ijpara.2009.04.003. PubMed PMID: 19433092.
- 826 16. Barragan A, Sibley LD. Transepithelial migration of *Toxoplasma gondii* is linked to  
827 parasite motility and virulence. *J Exp Med*. 2002;195(12):1625-33. Epub 2002/06/19. doi:  
828 10.1084/jem.20020258. PubMed PMID: 12070289; PubMed Central PMCID:  
829 PMCPMC2193562.
- 830 17. Munoz M, Liesenfeld O, Heimesaat MM. Immunology of *Toxoplasma gondii*. *Immunol*  
831 *Rev*. 2011;240(1):269-85. Epub 2011/02/26. doi: 10.1111/j.1600-065X.2010.00992.x. PubMed  
832 PMID: 21349099.
- 833 18. Sichien D, Lambrecht BN, Guilliams M, Scott CL. Development of conventional  
834 dendritic cells: from common bone marrow progenitors to multiple subsets in peripheral tissues.  
835 *Mucosal Immunol*. 2017;10(4):831-44. Epub 2017/02/16. doi: 10.1038/mi.2017.8. PubMed  
836 PMID: 28198365.

- 837 19. Durai V, Murphy KM. Functions of Murine Dendritic Cells. *Immunity*. 2016;45(4):719-  
838 36. Epub 2016/10/21. doi: 10.1016/j.immuni.2016.10.010. PubMed PMID: 27760337; PubMed  
839 Central PMCID: PMC5145312.
- 840 20. Merad M, Sathe P, Helft J, Miller J, Mortha A. The dendritic cell lineage: ontogeny and  
841 function of dendritic cells and their subsets in the steady state and the inflamed setting. *Annu*  
842 *Rev Immunol*. 2013;31:563-604. Epub 2013/03/23. doi: 10.1146/annurev-immunol-020711-  
843 074950. PubMed PMID: 23516985; PubMed Central PMCID: PMC3853342.
- 844 21. Dominguez PM, Ardavin C. Differentiation and function of mouse monocyte-derived  
845 dendritic cells in steady state and inflammation. *Immunol Rev*. 2010;234(1):90-104. Epub  
846 2010/03/03. doi: 10.1111/j.0105-2896.2009.00876.x. PubMed PMID: 20193014.
- 847 22. Sanecka A, Frickel EM. Use and abuse of dendritic cells by *Toxoplasma gondii*.  
848 *Virulence*. 2012;3(7):678-89. Epub 2012/12/12. doi: 10.4161/viru.22833. PubMed PMID:  
849 23221473; PubMed Central PMCID: PMC3545950.
- 850 23. Gazzinelli RT, Wysocka M, Hayashi S, Denkers EY, Hieny S, Caspar P, et al. Parasite-  
851 induced IL-12 stimulates early IFN-gamma synthesis and resistance during acute infection with  
852 *Toxoplasma gondii*. *J Immunol*. 1994;153(6):2533-43. Epub 1994/09/15. PubMed PMID:  
853 7915739.
- 854 24. Cohen SB, Denkers EY. Impact of *Toxoplasma gondii* on Dendritic Cell Subset Function  
855 in the Intestinal Mucosa. *J Immunol*. 2015;195(6):2754-62. Epub 2015/08/19. doi:  
856 10.4049/jimmunol.1501137. PubMed PMID: 26283477; PubMed Central PMCID:  
857 PMC4561193.
- 858 25. Aran D, Looney AP, Liu L, Wu E, Fong V, Hsu A, et al. Reference-based analysis of  
859 lung single-cell sequencing reveals a transitional profibrotic macrophage. *Nat Immunol*.



- 860 2019;20(2):163-72. Epub 2019/01/16. doi: 10.1038/s41590-018-0276-y. PubMed PMID:  
861 30643263; PubMed Central PMCID: PMC6340744.
- 862 26. Heng TS, Painter MW, Immunological Genome Project C. The Immunological Genome  
863 Project: networks of gene expression in immune cells. *Nat Immunol.* 2008;9(10):1091-4. Epub  
864 2008/09/19. doi: 10.1038/ni1008-1091. PubMed PMID: 18800157.
- 865 27. Jones A, Bourque J, Kuehm L, Opejin A, Teague RM, Gross C, et al. Immunomodulatory  
866 Functions of BTLA and HVEM Govern Induction of Extrathymic Regulatory T Cells and  
867 Tolerance by Dendritic Cells. *Immunity.* 2016;45(5):1066-77. Epub 2016/10/30. doi:  
868 10.1016/j.immuni.2016.10.008. PubMed PMID: 27793593; PubMed Central PMCID:  
869 PMC5112132.
- 870 28. Theisen DJ, Davidson JT, Briseno CG, Gargaro M, Lauron EJ, Wang Q, et al. WDFY4  
871 is required for cross-presentation in response to viral and tumor antigens. *Science.*  
872 2018;362(6415):694-9. Epub 2018/11/10. doi: 10.1126/science.aat5030. PubMed PMID:  
873 30409884; PubMed Central PMCID: PMC6655551.
- 874 29. Mashayekhi M, Sandau MM, Dunay IR, Frickel EM, Khan A, Goldszmid RS, et al.  
875 CD8alpha(+) dendritic cells are the critical source of interleukin-12 that controls acute infection  
876 by *Toxoplasma gondii* tachyzoites. *Immunity.* 2011;35(2):249-59. Epub 2011/08/27. doi:  
877 10.1016/j.immuni.2011.08.008. PubMed PMID: 21867928; PubMed Central PMCID:  
878 PMC3171793.
- 879 30. John B, Harris TH, Tait ED, Wilson EH, Gregg B, Ng LG, et al. Dynamic Imaging of  
880 CD8(+) T cells and dendritic cells during infection with *Toxoplasma gondii*. *PLoS Pathog.*  
881 2009;5(7):e1000505. Epub 2009/07/07. doi: 10.1371/journal.ppat.1000505. PubMed PMID:  
882 19578440; PubMed Central PMCID: PMC2700268.

- 883 31. Blanchette J, Jaramillo M, Olivier M. Signalling events involved in interferon-gamma-  
884 inducible macrophage nitric oxide generation. *Immunology*. 2003;108(4):513-22. Epub  
885 2003/04/02. doi: 10.1046/j.1365-2567.2003.01620.x. PubMed PMID: 12667213; PubMed  
886 Central PMCID: PMCPMC1782926.
- 887 32. Choi J, Park S, Biering SB, Selleck E, Liu CY, Zhang X, et al. The parasitophorous  
888 vacuole membrane of *Toxoplasma gondii* is targeted for disruption by ubiquitin-like conjugation  
889 systems of autophagy. *Immunity*. 2014;40(6):924-35. Epub 2014/06/17. doi:  
890 10.1016/j.immuni.2014.05.006. PubMed PMID: 24931121; PubMed Central PMCID:  
891 PMCPMC4107903.
- 892 33. Goldszmid RS, Coppens I, Lev A, Caspar P, Mellman I, Sher A. Host ER-  
893 parasitophorous vacuole interaction provides a route of entry for antigen cross-presentation in  
894 *Toxoplasma gondii*-infected dendritic cells. *J Exp Med*. 2009;206(2):399-410. Epub 2009/01/21.  
895 doi: 10.1084/jem.20082108. PubMed PMID: 19153244; PubMed Central PMCID:  
896 PMCPMC2646567.
- 897 34. Kroczeck RA, Henn V. The Role of XCR1 and its Ligand XCL1 in Antigen Cross-  
898 Presentation by Murine and Human Dendritic Cells. *Front Immunol*. 2012;3:14. Epub  
899 2012/05/09. doi: 10.3389/fimmu.2012.00014. PubMed PMID: 22566900; PubMed Central  
900 PMCID: PMCPMC3342032.
- 901 35. Bosteels C, Neyt K, Vanheerswynghe M, van Helden MJ, Sichien D, Debeuf N, et al.  
902 Inflammatory Type 2 cDCs Acquire Features of cDC1s and Macrophages to Orchestrate  
903 Immunity to Respiratory Virus Infection. *Immunity*. 2020;52(6):1039-56 e9. Epub 2020/05/12.  
904 doi: 10.1016/j.immuni.2020.04.005. PubMed PMID: 32392463; PubMed Central PMCID:  
905 PMCPMC7207120.

- 906 36. Min J, Yang D, Kim M, Haam K, Yoo A, Choi JH, et al. Inflammation induces two types  
907 of inflammatory dendritic cells in inflamed lymph nodes. *Exp Mol Med*. 2018;50(3):e458. Epub  
908 2018/03/17. doi: 10.1038/emm.2017.292. PubMed PMID: 29546878; PubMed Central PMCID:  
909 PMC5898896.
- 910 37. Sheng J, Chen Q, Soncin I, Ng SL, Karjalainen K, Ruedl C. A Discrete Subset of  
911 Monocyte-Derived Cells among Typical Conventional Type 2 Dendritic Cells Can Efficiently  
912 Cross-Present. *Cell Rep*. 2017;21(5):1203-14. Epub 2017/11/02. doi:  
913 10.1016/j.celrep.2017.10.024. PubMed PMID: 29091760.
- 914 38. Sharma MD, Rodriguez PC, Koehn BH, Baban B, Cui Y, Guo G, et al. Activation of p53  
915 in Immature Myeloid Precursor Cells Controls Differentiation into Ly6c(+)CD103(+) Monocytic  
916 Antigen-Presenting Cells in Tumors. *Immunity*. 2018;48(1):91-106 e6. Epub 2018/01/19. doi:  
917 10.1016/j.immuni.2017.12.014. PubMed PMID: 29343444; PubMed Central PMCID:  
918 PMC6005382.
- 919 39. Meredith MM, Liu K, Darrasse-Jeze G, Kamphorst AO, Schreiber HA, Guermonprez P,  
920 et al. Expression of the zinc finger transcription factor zDC (Zbtb46, Btd4) defines the classical  
921 dendritic cell lineage. *J Exp Med*. 2012;209(6):1153-65. Epub 2012/05/23. doi:  
922 10.1084/jem.20112675. PubMed PMID: 22615130; PubMed Central PMCID:  
923 PMC3371731.
- 924 40. Bosschaerts T, Guilliams M, Stijlemans B, Morias Y, Engel D, Tacke F, et al. Tip-DC  
925 development during parasitic infection is regulated by IL-10 and requires CCL2/CCR2, IFN-  
926 gamma and MyD88 signaling. *PLoS Pathog*. 2010;6(8):e1001045. Epub 2010/08/18. doi:  
927 10.1371/journal.ppat.1001045. PubMed PMID: 20714353; PubMed Central PMCID:  
928 PMC2920868.

- 929 41. Rastogi S, Xue Y, Quake SR, Boothroyd JC. Differential Impacts on Host Transcription  
930 by ROP and GRA Effectors from the Intracellular Parasite *Toxoplasma gondii*. *mBio*.  
931 2020;11(3). Epub 2020/06/11. doi: 10.1128/mBio.00182-20. PubMed PMID: 32518180;  
932 PubMed Central PMCID: PMC7373195.
- 933 42. Wang M, Zhang FK, Elsheikha HM, Zhang NZ, He JJ, Luo JX, et al. Transcriptomic  
934 insights into the early host-pathogen interaction of cat intestine with *Toxoplasma gondii*. *Parasit*  
935 *Vectors*. 2018;11(1):592. Epub 2018/11/16. doi: 10.1186/s13071-018-3179-8. PubMed PMID:  
936 30428922; PubMed Central PMCID: PMC6236892.
- 937 43. Kirkling ME, Cytlak U, Lau CM, Lewis KL, Resteu A, Khodadadi-Jamayran A, et al.  
938 Notch Signaling Facilitates In Vitro Generation of Cross-Presenting Classical Dendritic Cells.  
939 *Cell Rep*. 2018;23(12):3658-72 e6. Epub 2018/06/21. doi: 10.1016/j.celrep.2018.05.068.  
940 PubMed PMID: 29925006; PubMed Central PMCID: PMC6063084.
- 941 44. Daryani A, Sharif M, Dadimoghaddam Y, Souteh MB, Ahmadpour E, Khalilian A, et al.  
942 Determination of parasitic load in different tissues of murine toxoplasmosis after immunization  
943 by excretory-secretory antigens using Real time QPCR. *Exp Parasitol*. 2014;143:55-9. Epub  
944 2014/05/24. doi: 10.1016/j.exppara.2014.05.008. PubMed PMID: 24852216.
- 945 45. Grover HS, Blanchard N, Gonzalez F, Chan S, Robey EA, Shastri N. The *Toxoplasma*  
946 *gondii* peptide AS15 elicits CD4 T cells that can control parasite burden. *Infect Immun*.  
947 2012;80(9):3279-88. Epub 2012/07/11. doi: 10.1128/IAI.00425-12. PubMed PMID: 22778097;  
948 PubMed Central PMCID: PMC3418726.
- 949 46. Grover HS, Chu HH, Kelly FD, Yang SJ, Reese ML, Blanchard N, et al. Impact of  
950 regulated secretion on antiparasitic CD8 T cell responses. *Cell Rep*. 2014;7(5):1716-28. Epub

951 2014/05/27. doi: 10.1016/j.celrep.2014.04.031. PubMed PMID: 24857659; PubMed Central  
952 PMCID: PMC4057976.

953 47. Hao Y, Hao S, Andersen-Nissen E, Mauck WM, 3rd, Zheng S, Butler A, et al. Integrated  
954 analysis of multimodal single-cell data. *Cell*. 2021;184(13):3573-87 e29. Epub 2021/06/02. doi:  
955 10.1016/j.cell.2021.04.048. PubMed PMID: 34062119; PubMed Central PMCID:  
956 PMCPMC8238499.

957 48. van Dijk D, Sharma R, Nainys J, Yim K, Kathail P, Carr AJ, et al. Recovering Gene  
958 Interactions from Single-Cell Data Using Data Diffusion. *Cell*. 2018;174(3):716-29 e27. Epub  
959 2018/07/03. doi: 10.1016/j.cell.2018.05.061. PubMed PMID: 29961576; PubMed Central  
960 PMCID: PMC6771278.

961

962

## 963 **Figure Legends**

964 **Figure 1: Bcl3 expression in classical dendritic cells is critical for protection against**

965 ***T. gondii*.**

966 Mice with the indicated Bcl3 genotypes were infected with 15 cysts of *T. gondii* (ME49 strain)  
967 and monitored for survival (A), body weight changes (B) and brain parasite load (C). Data are  
968 summarized from 2 independent experiments with n=12 mice in each group for A and B. In C,  
969 n=6 mice in each group were selected randomly from the mice in part A. Data are shown as the  
970 mean  $\pm$  SEM. The survival curve was analyzed by the log-rank Mantel-cox test. Student's  
971 unpaired t test was used for (B) and (C). \*\*p<0.01, \*\*\*p<0.001.

972 **Figure 2: Mice lacking Bcl3 in classical dendritic cells have impaired immune responses to**  
973 ***T. gondii* infection and an increased parasite load.**

974 The indicated mice were infected ip with 15 cysts of *T. gondii* (ME49 strain) and assessed for  
975 spleen parasite load (A) and serum IFN- $\gamma$  and IL-12 concentration (B) at 7 D PI (Bi, Ci) and 21  
976 D PI (Bii, Cii). In panel D, splenocytes from uninfected and infected mice were stimulated ex  
977 vivo 7 days PI with STAg (5 mg/ml) for 72 hours. Supernatants were collected and IFN- $\gamma$  (i), IL-  
978 12 p40 (ii) and nitric oxide (iii) levels were determined by ELISA. Data are shown as the mean  
979  $\pm$  SEM, n=3 for uninfected mice and n= 9 for all infected groups, which were pooled from 3  
980 independent experiments. Student`s unpaired t test was used for statistical analysis. \*\*p<0.01,  
981 \*\*\*p<0.001, \*\*\*\*p<0.0001.

982 **Figure 3: Classical dendritic cell Bcl3 deficiency distorts the distribution of dendritic cell**  
983 **subsets after *T. gondii* infection.**

984 Splenic CD11c<sup>+</sup> cells were enriched by magnet-based sorting from uninfected wildtype and  
985 *Bcl3<sup>flx/flx</sup> Zbtb46 cre* mice, as well as from wildtype and *Bcl3<sup>flx/flx</sup> Zbtb46 cre* mice 7 day after *T.*  
986 *gondii* infection. The sorted cells were immediately processed for single cell RNA sequencing.  
987 (A) UMAP of splenic dendritic cell single cell data merged from all four samples (PCs = 1:30,  
988 Res = 0.3) (B) Heatmap of the top 30 cluster markers. Thirteen different clusters were re-  
989 grouped and re-ordered as cDC1 (blue bar), cDC1mig (migratory cDC1, green bar), cDC2mig  
990 (migratory cDC2, dark red bar), and cDC2 (red bar), based on shared cluster-specific genes  
991 across clusters. Colored gene name labels on either side of heatmap indicate the representative  
992 genes for cDC1 (blue box), cDC2 (red box), migratory DC (green box), and cDC2mig (dark red  
993 box). Other cluster specific genes are represented in black text. (C) UMAP split by experimental  
994 conditions, grouped by cluster (upper left panel) and grouped by DC type (lower left panel).

995 Right panel shows the proportion (%) of each cluster in every experimental group, represented  
996 with different sized and colored circles to show how each cluster is affected by Bcl3-deficiency  
997 or *T. gondii* infection (D) Volcano plots to show genes differentially expressed between infected  
998 wildtype and infected *Bcl3<sup>flx/flx</sup> Zbtb46 cre* conditions in cDC1, cDC1mig, cDC2, and cDC2mig  
999 cells significant at average log<sub>2</sub>FC > 0.5 and -log<sub>10</sub>(p-value) > 1.3. X axis denotes the average  
1000 log<sub>2</sub>FC (Fold Change). Y-axis denotes the -log<sub>10</sub> transformed p-values. (E) Heatmap showing  
1001 average expression for genes associated with antigen presentation in cDC1, cDC1mig, cDC2,  
1002 and cDC2mig. (F) Double-positive cells: Zbtb46 and Lyz2, Ly6c2 and Xcr1, or Ly6c2 and Sirpa  
1003 were highlighted in black on split UMAP to illustrate the effects of Bcl3 deficiency and *T. gondii*  
1004 infection. Cells with higher than 0.2 normalized gene expression value were considered as  
1005 positive.

1006 **Figure 4: Generation of hybrid conventional DCs in *T. gondii*-infected spleen.**

1007 Mice were infected with 15 cysts of *T. gondii* (ME49 strain) and DC phenotyping of splenocytes  
1008 was performed 7 days post infection. Novel infection-associated DC subsets were designated  
1009 icDC. (A) Gating strategy for dendritic cell subsets. (B) Time course for accumulation of the  
1010 indicated DC subpopulations in wildtype and *Bcl3<sup>-/-</sup>* mice. (C and D) Bcl3-dependent  
1011 distribution of splenic icDC (icDC1 and icDC2) (C) and cDC (cDC1 and cDC2) (D) subsets.  
1012 The Bcl3 genotype code is shown in the upper right of each panel. Data are summarized as the  
1013 mean ± SEM of n = 6 mice/group pooled from 2 independent experiments. Student's unpaired t  
1014 test was used for statistical analysis. \*p<0.05, \*\*p<0.01, \*\*\*\*p<0.0001.

1015 **Figure 5: Bcl3 is pivotal for antigen presentation by XCR1<sup>+</sup> conventional dendritic cells and**  
1016 **antigen-specific T cell responses against *T. gondii*.**

1017 (A, B) Defective antigen-specific T cell proliferation. Splenic XCR1<sup>+</sup> and CD11b<sup>+</sup> cells were  
1018 isolated from naive wildtype and *Bcl3<sup>flx/flx</sup> Zbtb46 cre* mice. Cells were pulsed with class I (Kb)-  
1019 restricted OVA peptide 257-264 for 3 hours (A) or infected with ova-expressing *T. gondii*  
1020 (Rhcontrol and Rh-ova) for 24 hours (B). Finally, they were cocultured with Cell tracer violet-  
1021 stained OT-I T cells for an additional 72 hours. T cells were analyzed by flow cytometry and the  
1022 proliferation profile for CD8<sup>+</sup> T cells was determined. Data are representative of 2 independent  
1023 experiments.

1024 (C-G) Defective antigen-specific T cell function. (C, D, E) Wildtype and *Bcl3<sup>flx/flx</sup> Zbtb46 cre*  
1025 mice were infected with 15 cysts of *T. gondii* (ME49 strain), then splenocytes were isolated 18  
1026 days later and stimulated with plate-bound anti-CD3 and soluble anti-CD28 for 6 h (C) or with  
1027 STAg for 72 h (D). Intracellular IFN- $\gamma$  and TNF- $\alpha$  in CD4<sup>+</sup> (left) and CD8<sup>+</sup> (right) cells were  
1028 measured by flow cytometry. (E) Ki67 staining was assessed for unstimulated CD4<sup>+</sup> and CD8<sup>+</sup> T  
1029 cells from infected spleen. Representative plots are summarized as the mean  $\pm$  SEM of n = 8  
1030 mice/group pooled from 3 experiments. Student's unpaired t test was used for statistical analysis.

1031 (F, G) Splenocytes were harvested from wildtype and *Bcl3<sup>flx/flx</sup> Zbtb46 cre* mice 3 weeks post  
1032 infection. *T. gondii*-specific CD4<sup>+</sup> T and CD8<sup>+</sup> T cell responses were measured by MHC class  
1033 I/II tetramer staining (F) and by intracellular IFN- $\gamma$  staining after in vitro restimulation with *T.*  
1034 *gondii*-specific peptide for 4 hours (G). Representative plots are summarized as the mean  $\pm$   
1035 SEM; n= 10 mice/group pooled from 3 experiments. Student's unpaired t test was used for  
1036 statistical analysis. \*p<0.05, \*\*p<0.01, \*\*\*p<0.001, \*\*\*\*p<0.0001.

1037 **Figure 6: Bcl3 deficient bone marrow-derived DCs fail to differentiate into potent antigen**  
1038 **presenting cells.**



1039 (A) Skewed DC differentiation in *Bcl3*-deficient cells. Bone marrow cells were isolated from  
1040 wildtype and *Bcl3*<sup>-/-</sup> mice and differentiated as described in Supplementary Fig. 8A with and  
1041 without IFN- $\gamma$  and OP9DL1 cells as defined above and to the right of each plot, respectively.  
1042 Expression of the indicated DC surface markers was examined after 7-9 days post differentiation.  
1043 Data are representative of 3 independent experiments.

1044 (B) Defective antigen presentation by *Bcl3*-deficient DCs. Differentiated BMDC from wildtype  
1045 and *Bcl3*<sup>-/-</sup> mice were used as APC and were either pulsed with class I (Kb)-restricted OVA  
1046 peptide 257-264 for 3 hours or infected with ova-expressing *T. gondii* for 24 hours. Finally, the  
1047 cells were cocultured with Cell tracer violet-loaded OT-I T cells for an additional 72 hours. T  
1048 cells were analyzed by flow cytometry and CD8<sup>+</sup> T cell proliferation was determined. Data are  
1049 representative of 2 independent experiments.

Figure 1

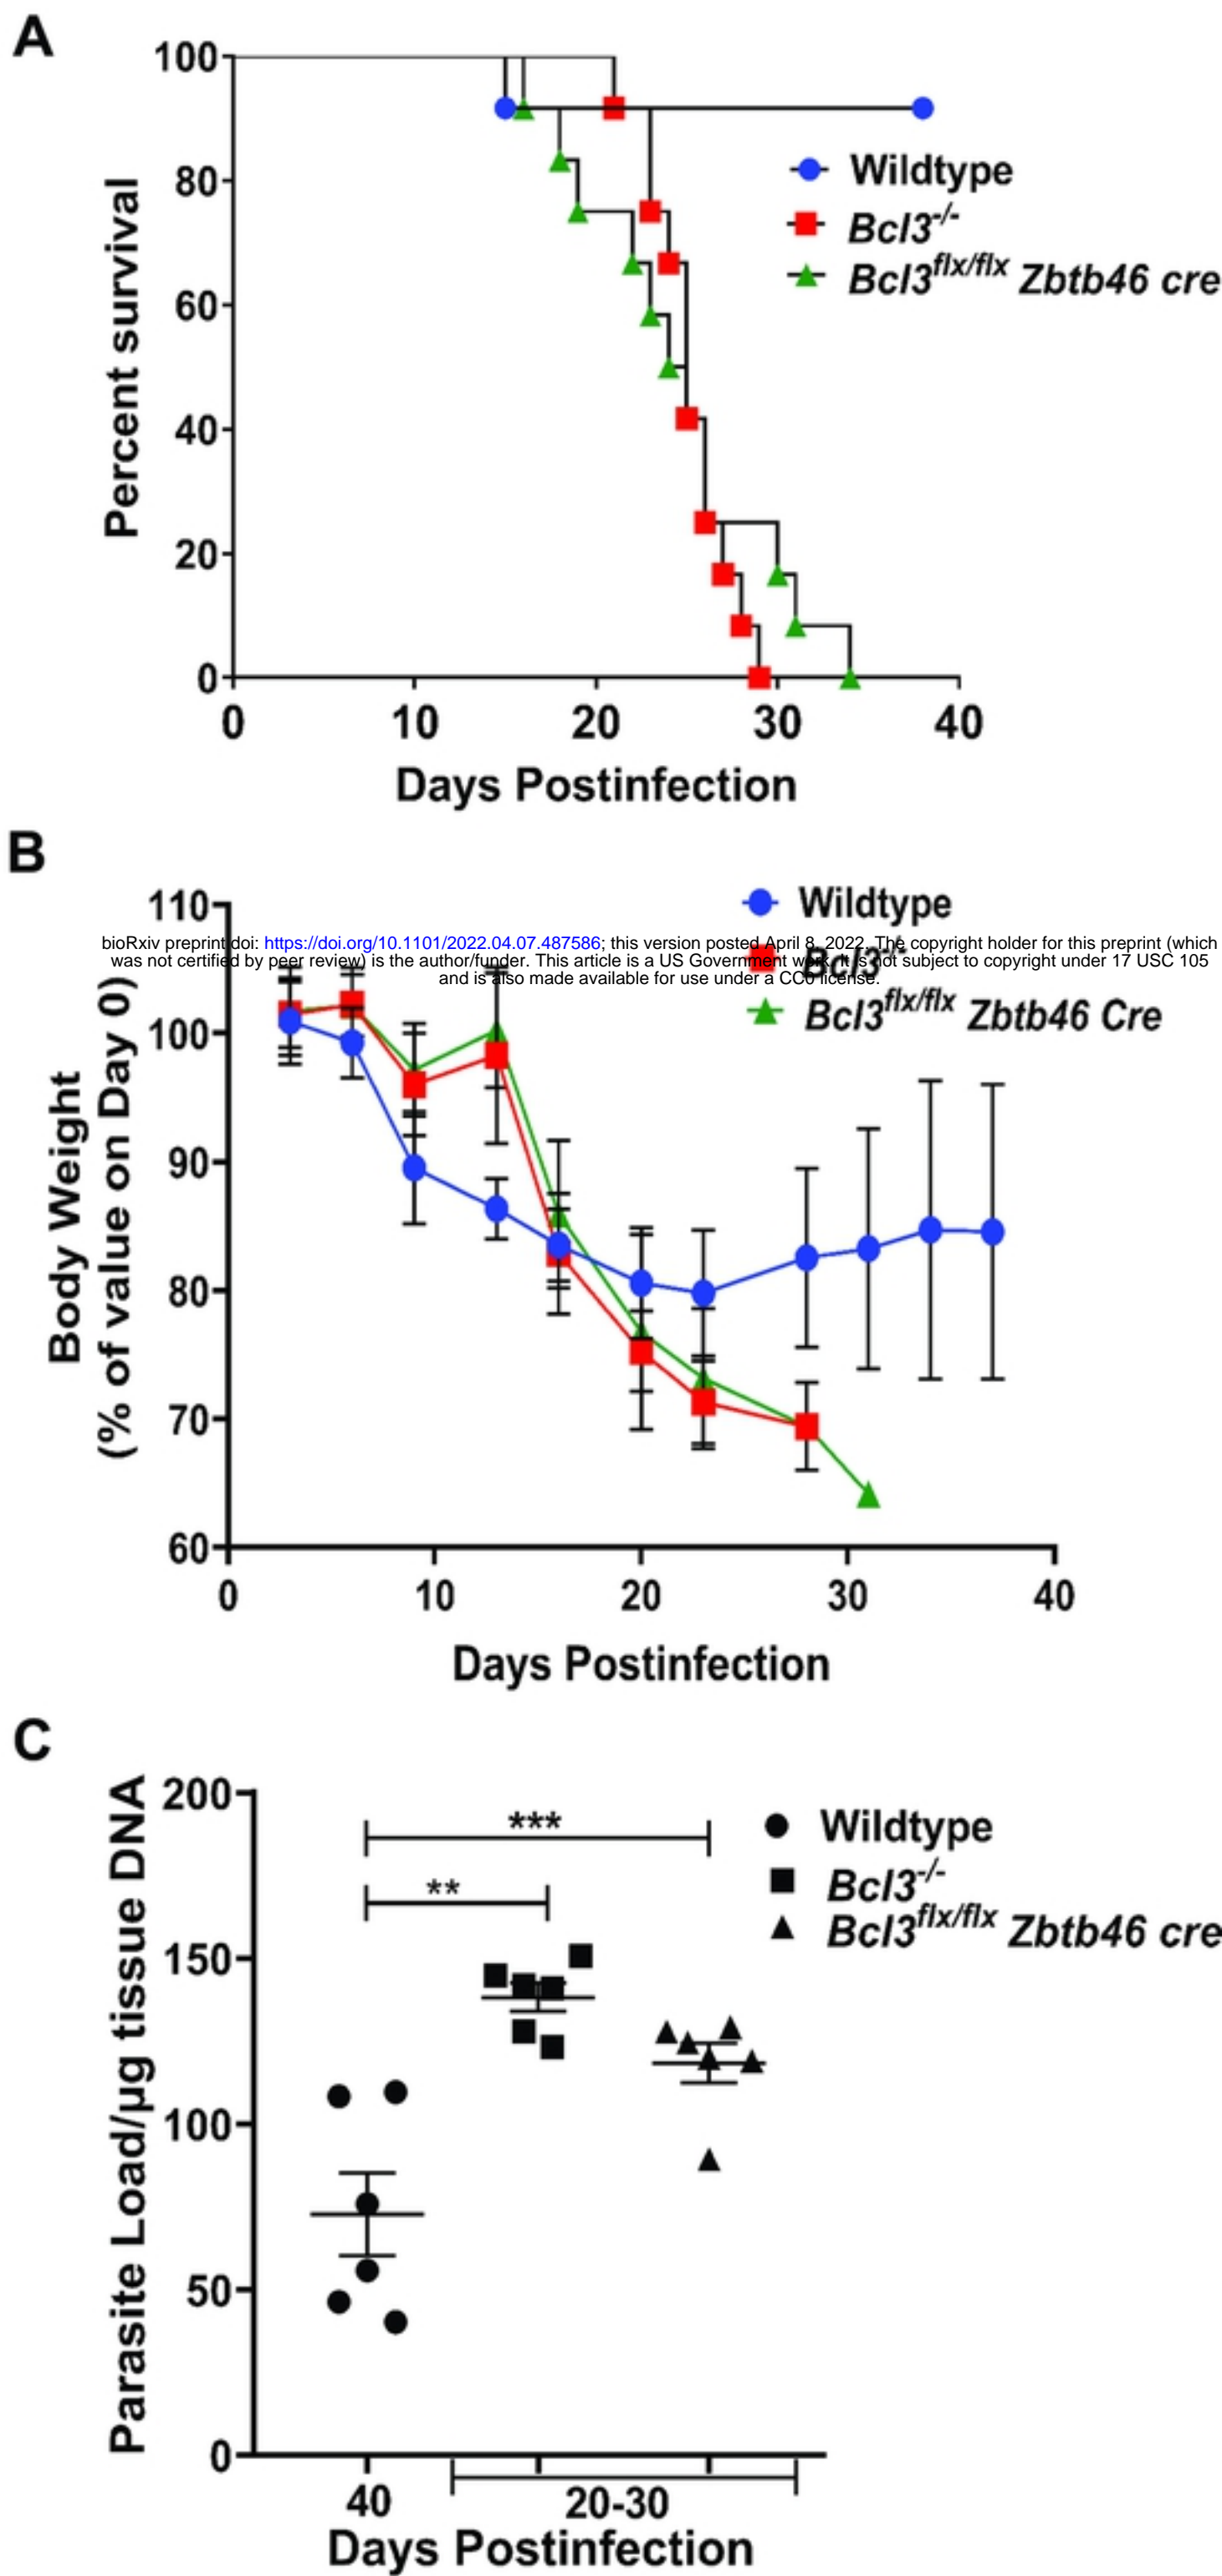

Figure 1

**Figure 2**  
**A**

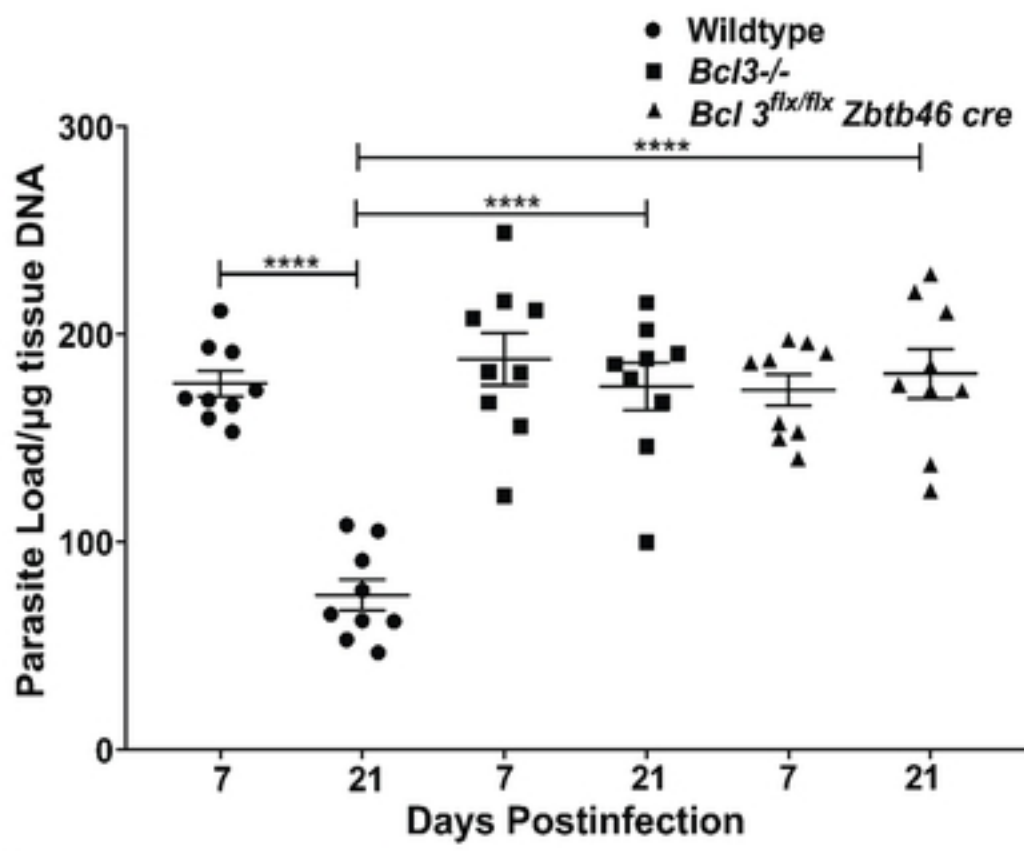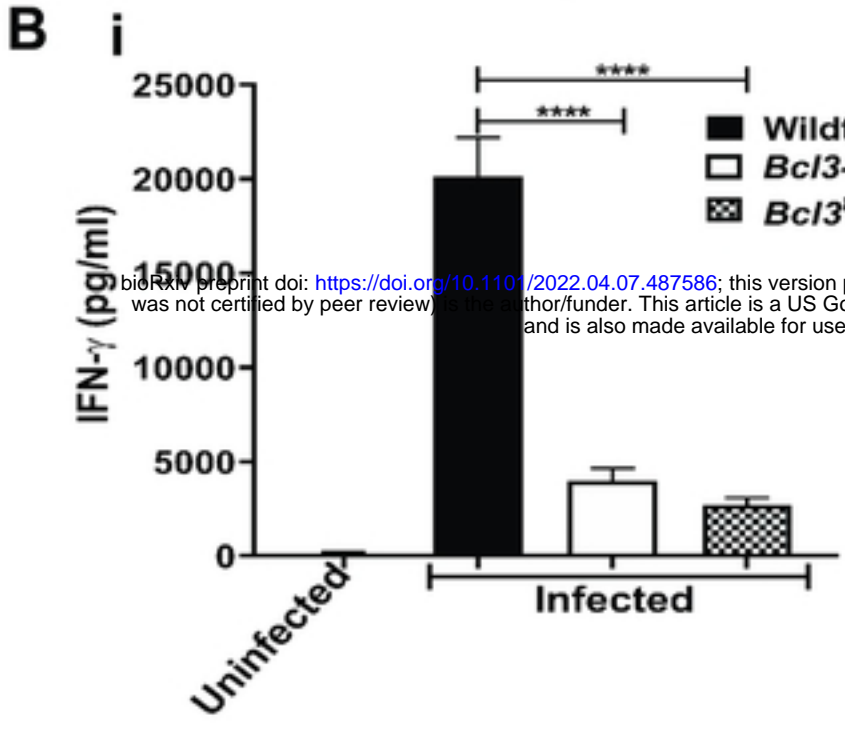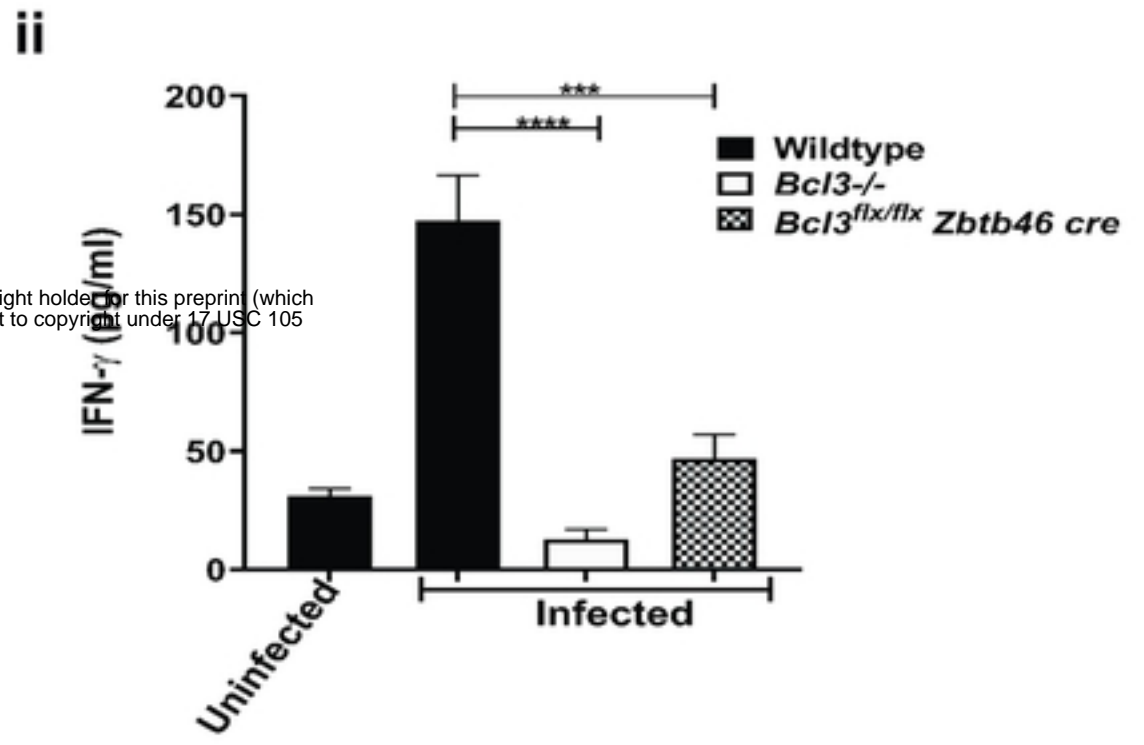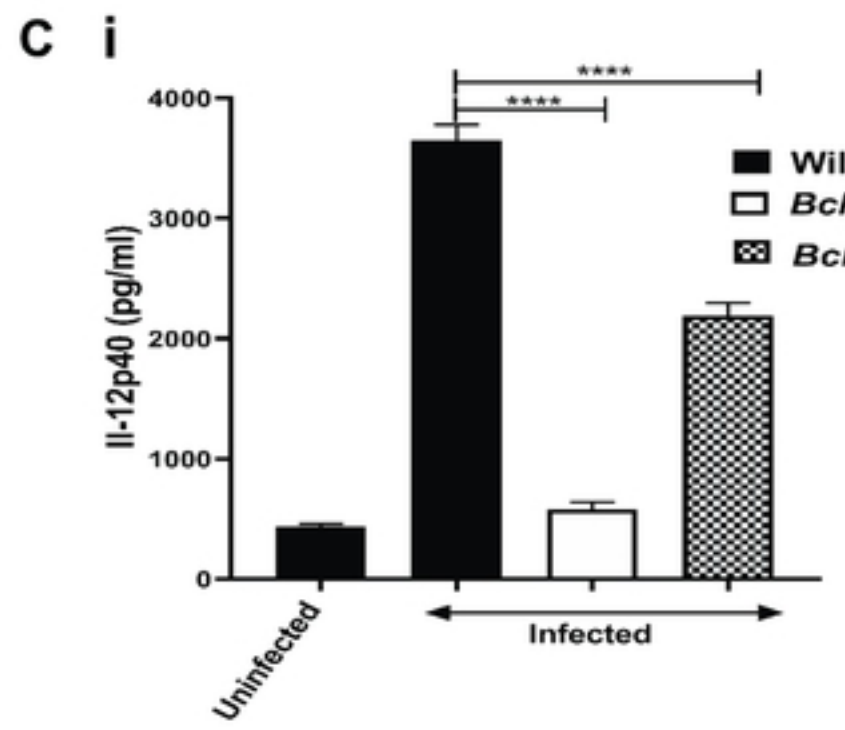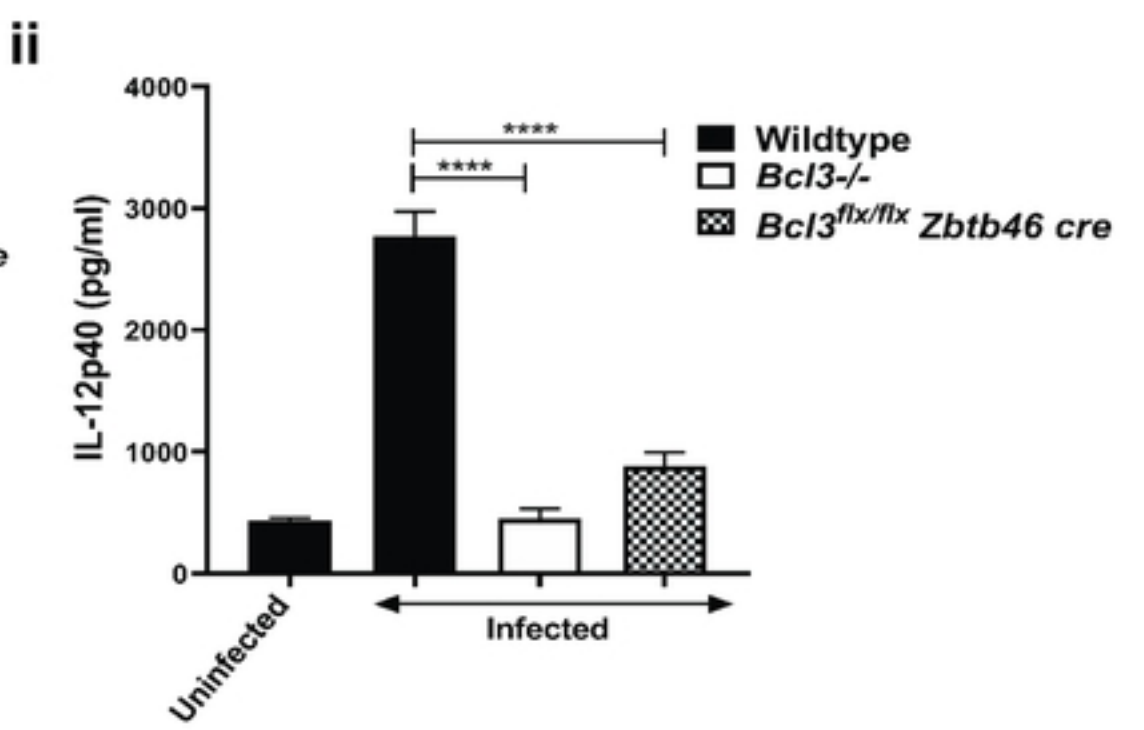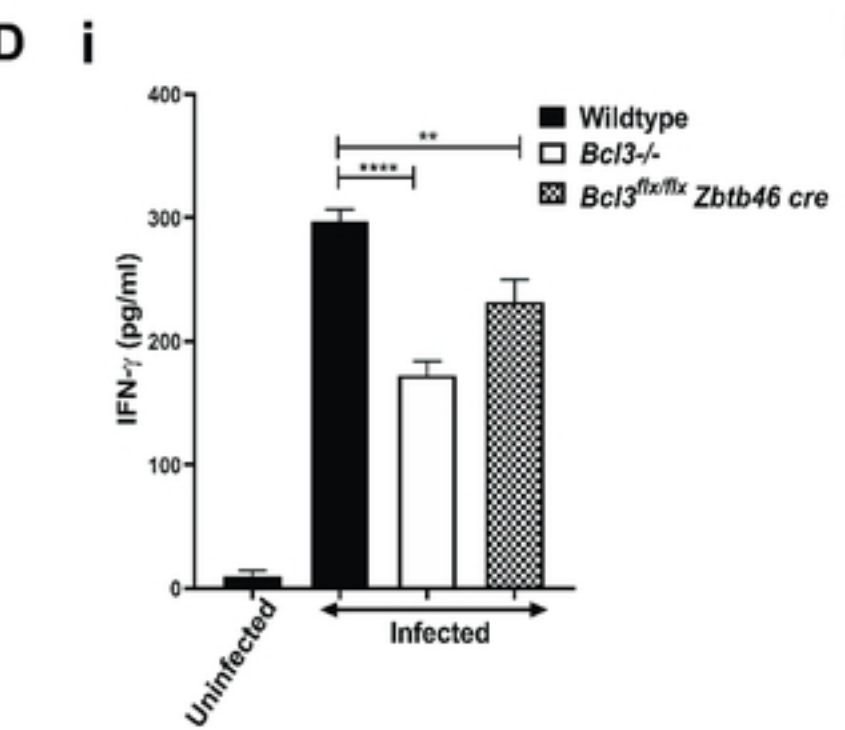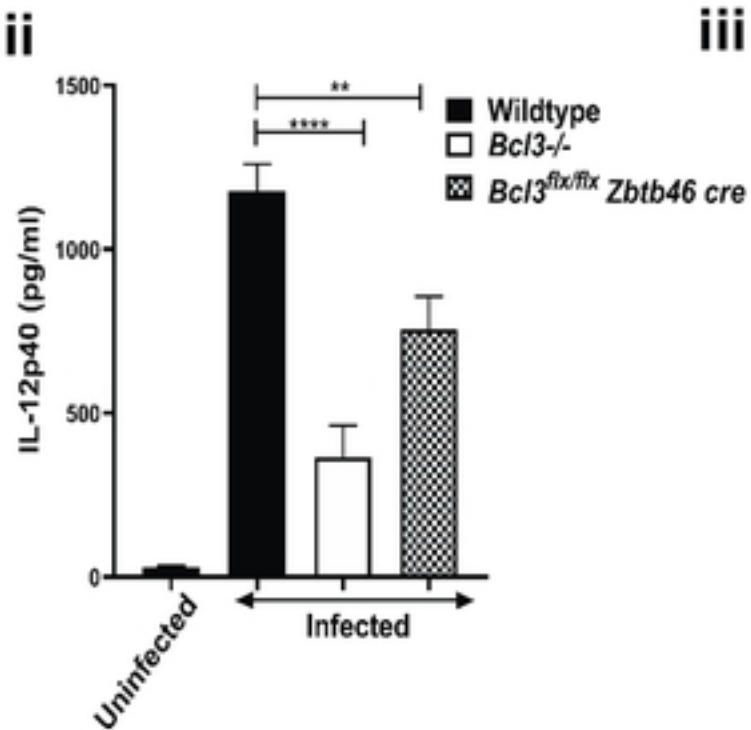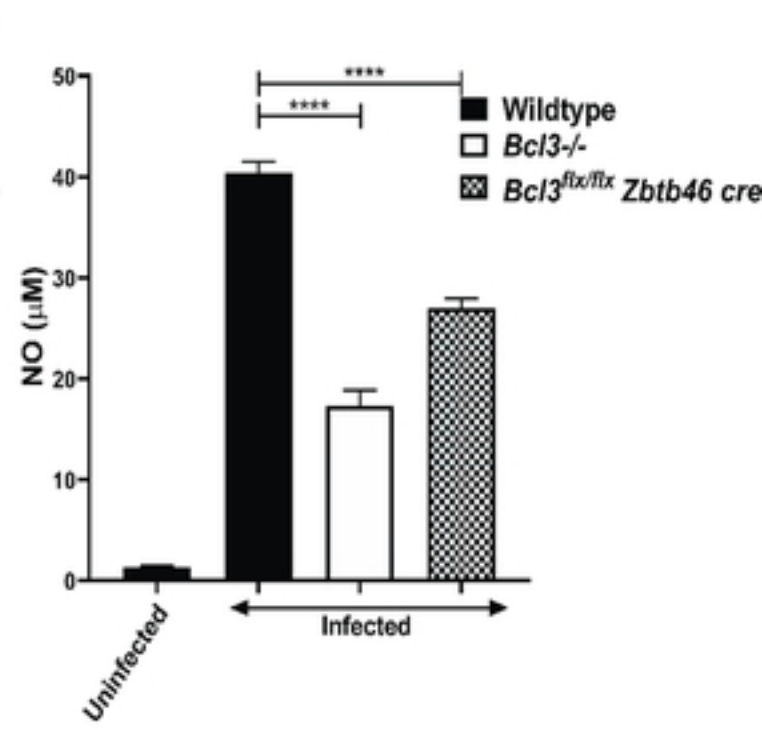

**Figure 2**

bioRxiv preprint doi: <https://doi.org/10.1101/2022.04.07.487586>; this version posted April 8, 2022. The copyright holder for this preprint (which was not certified by peer review) is the author/funder. This article is a US Government work. It is not subject to copyright under 17 USC 105 and is also made available for use under a CC0 license.

Figure 3

A

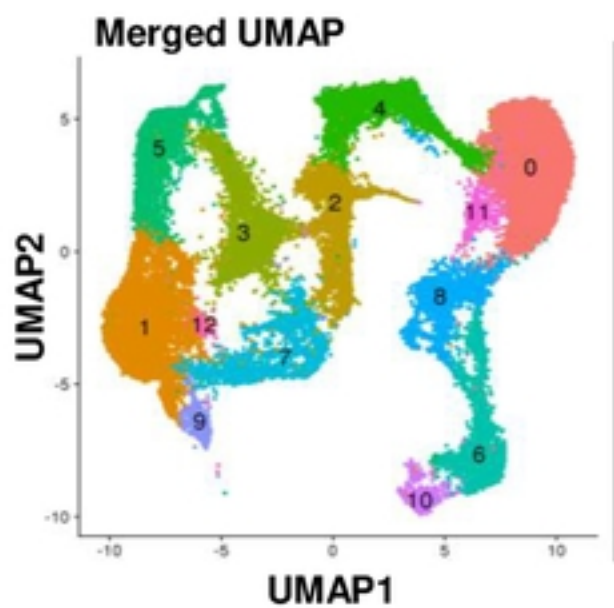

B

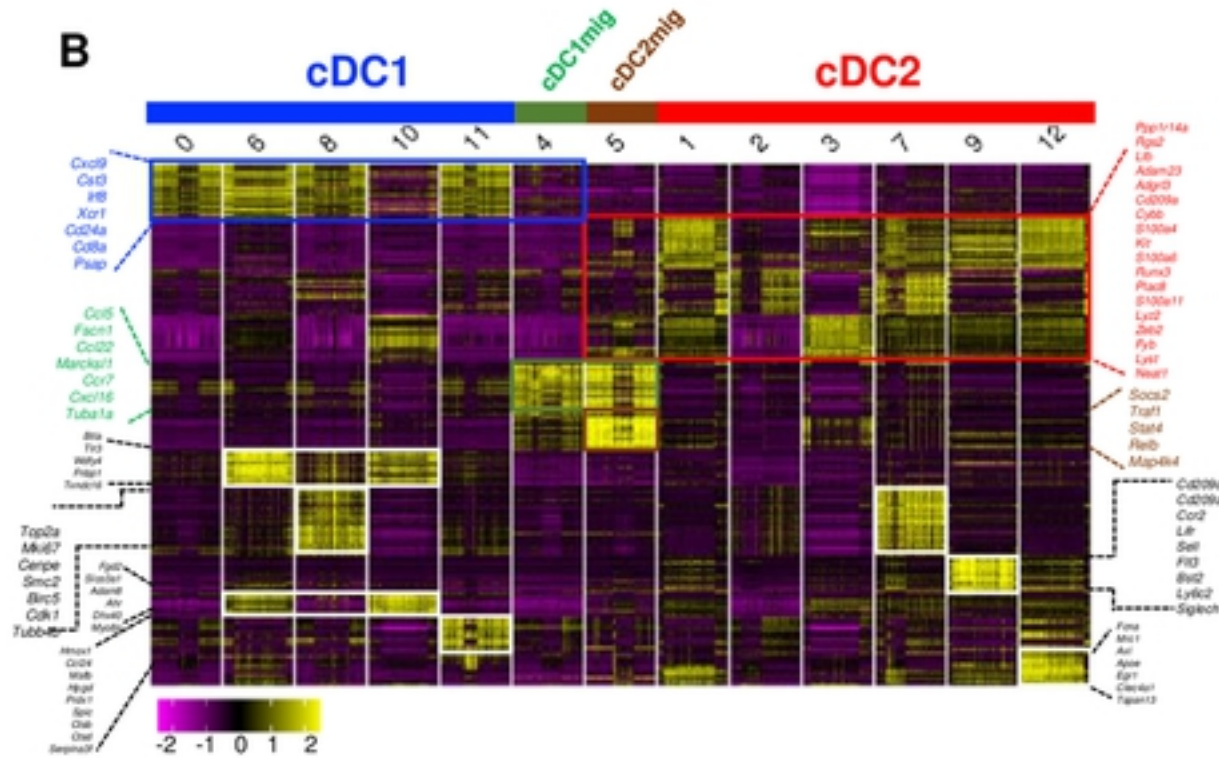

C

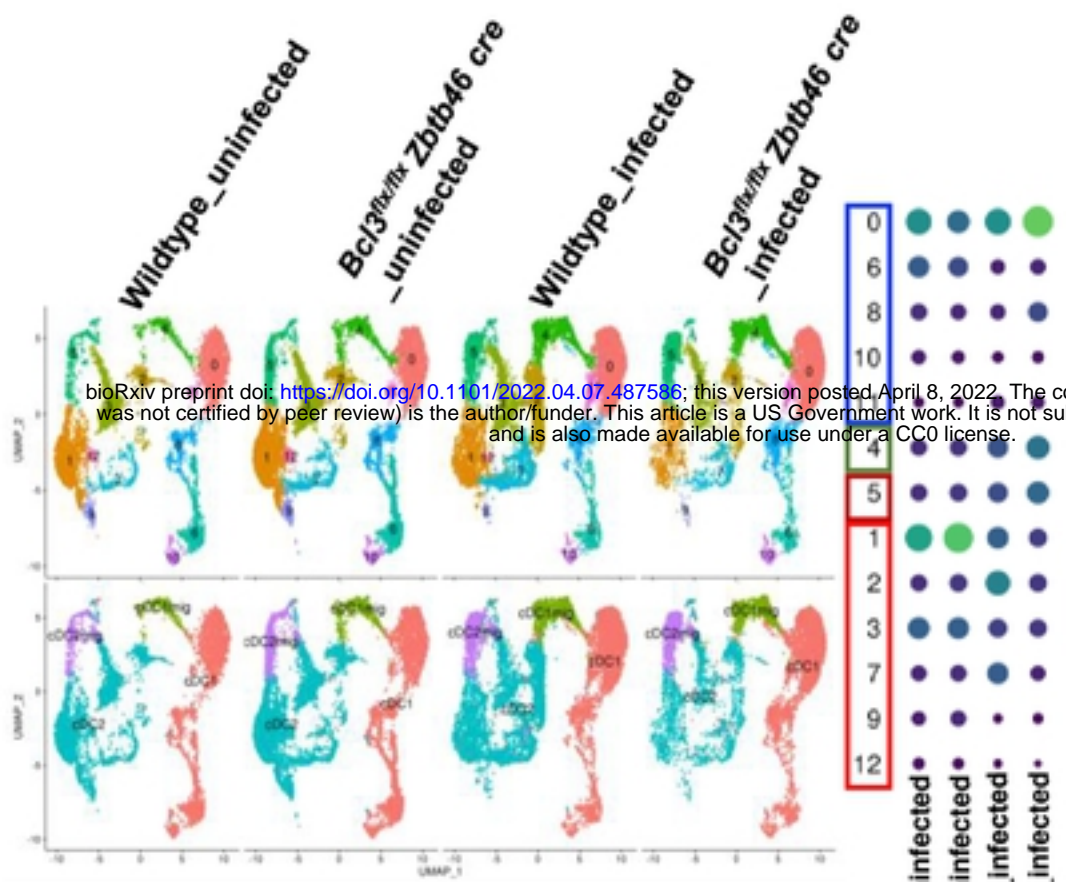

D

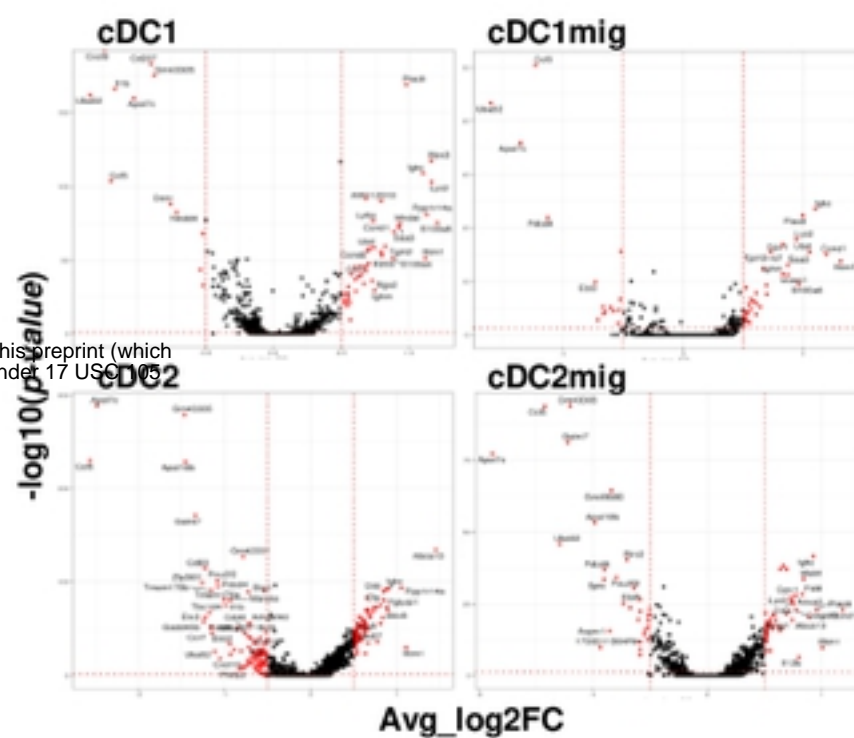

E

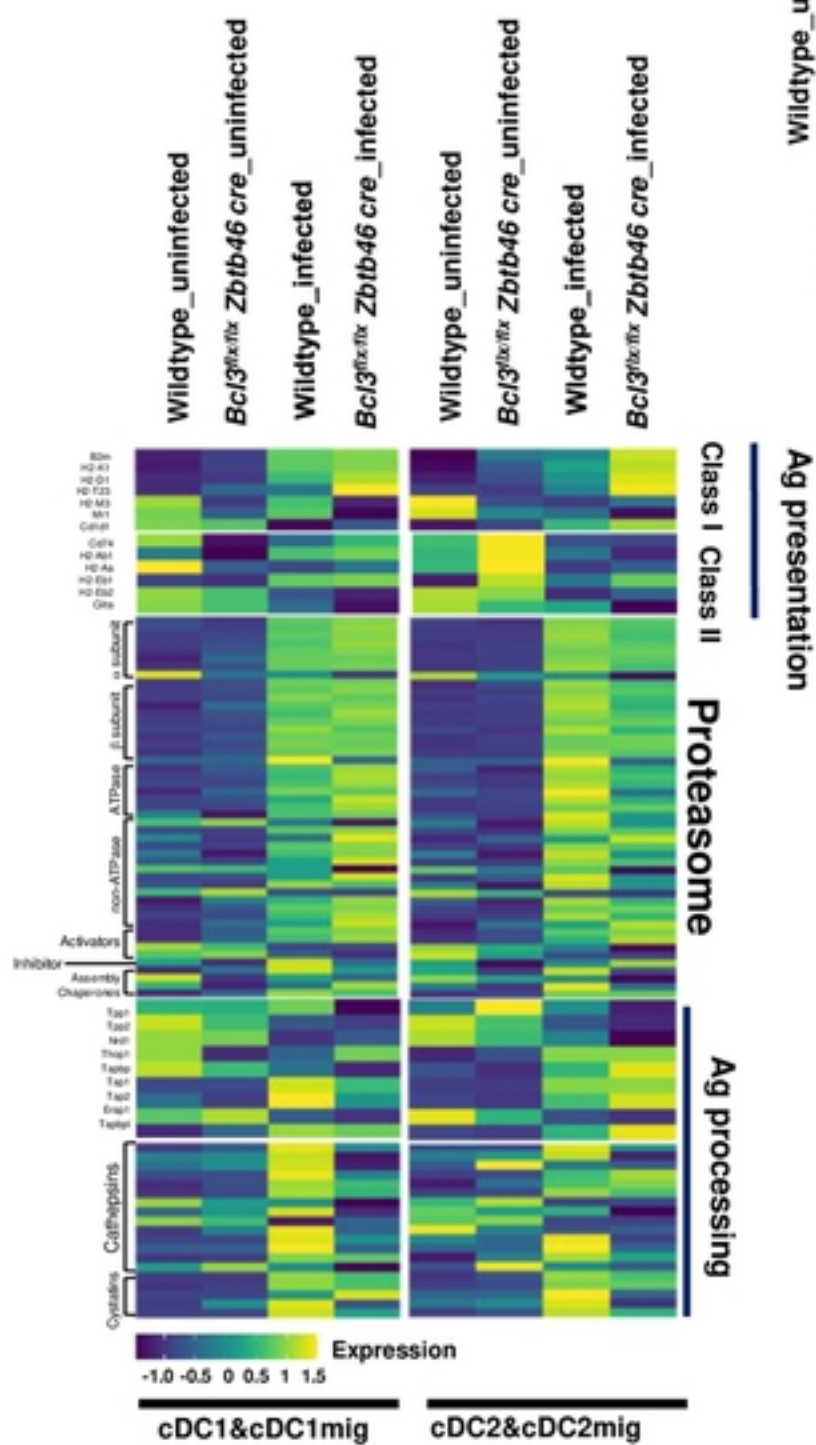

F

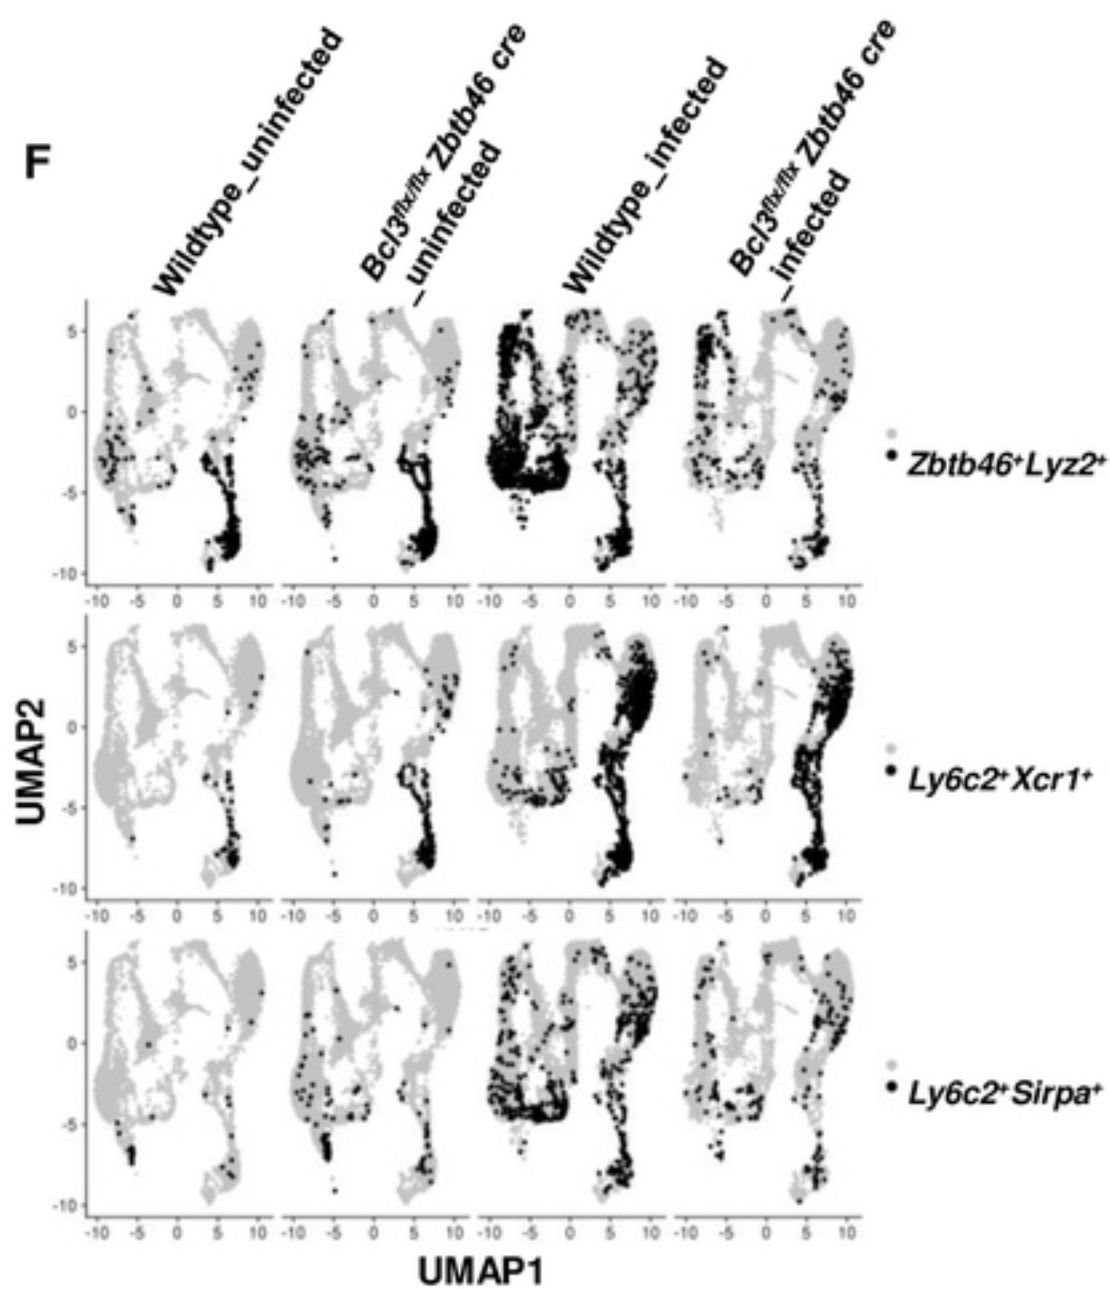

Figure 3

Figure 4

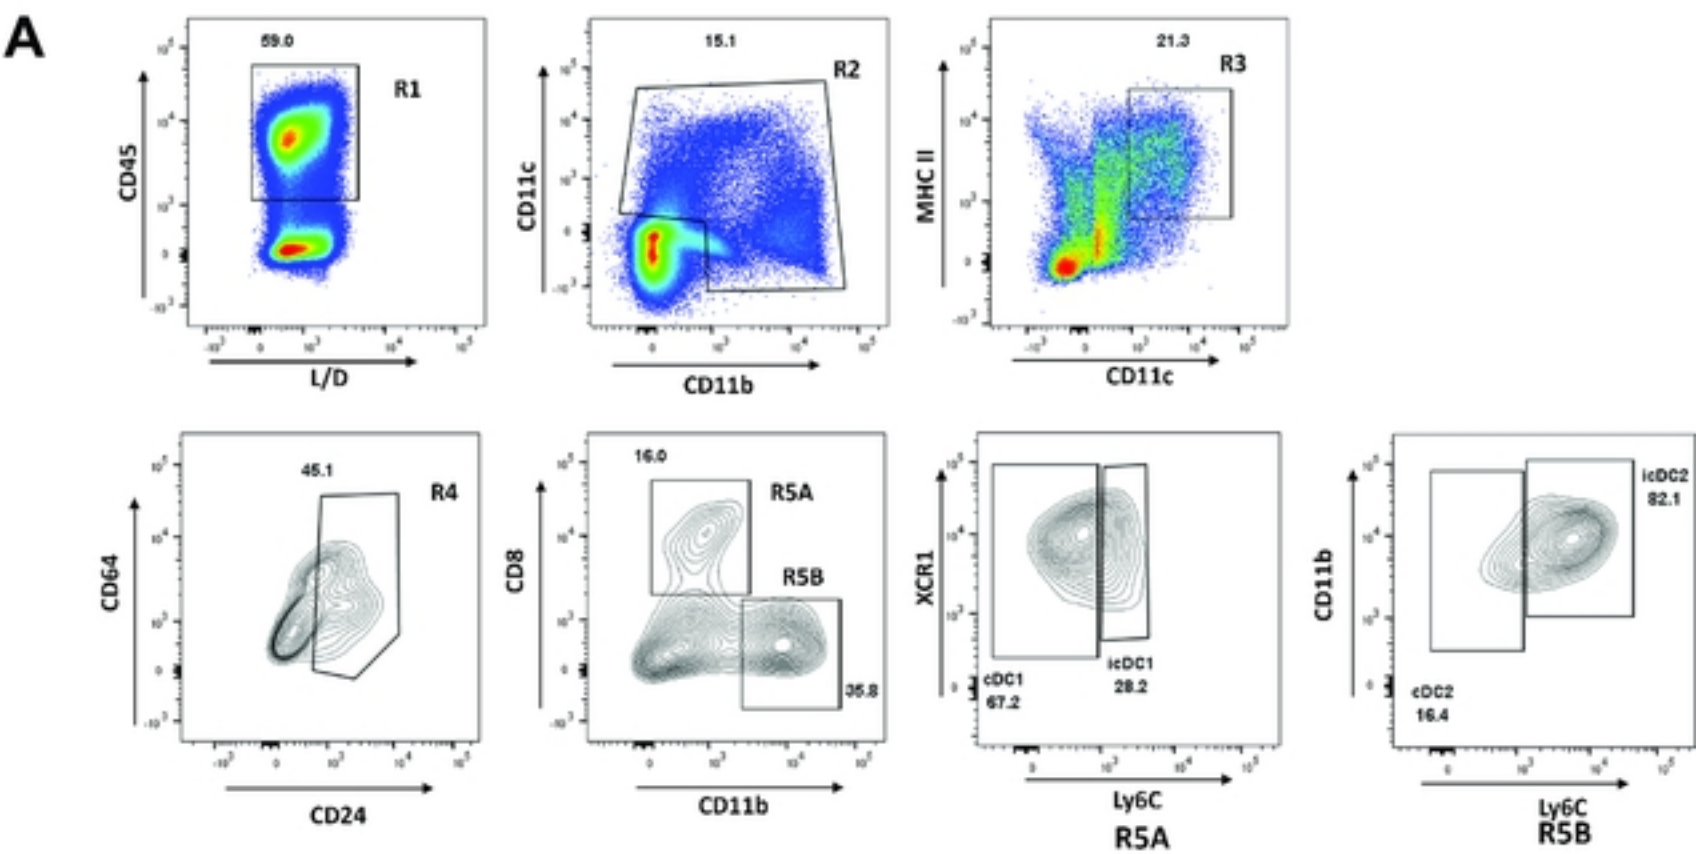

**B**

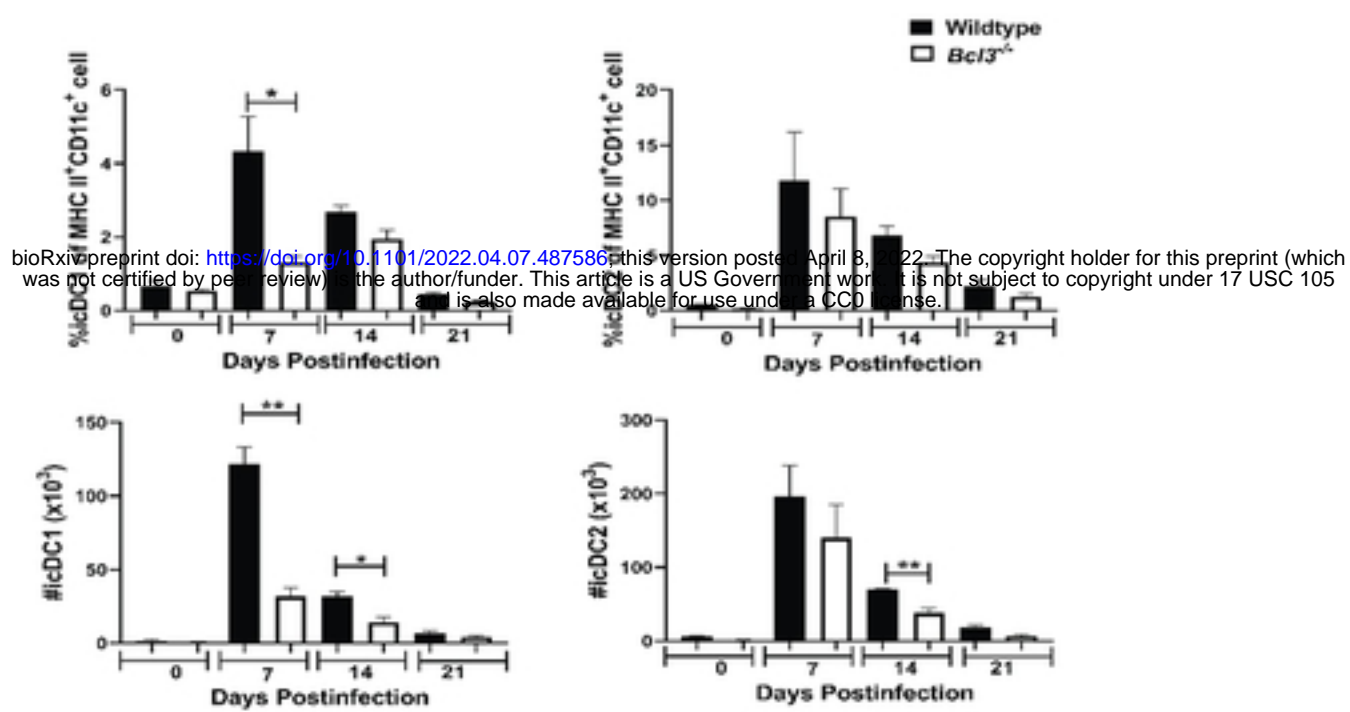

**C**

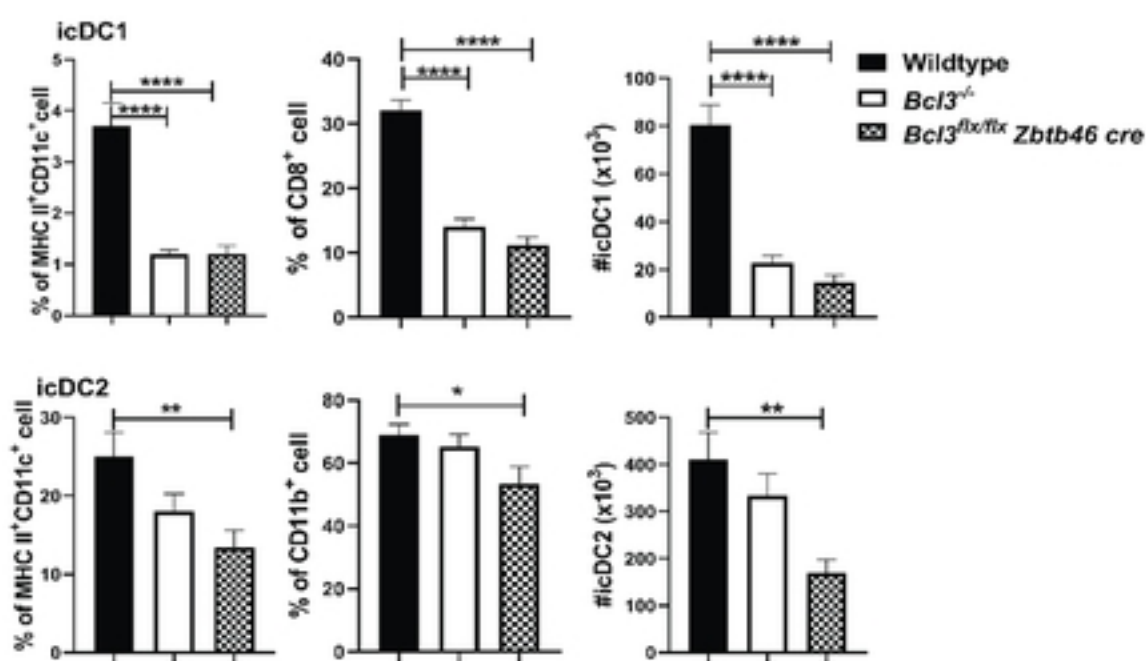

**D**

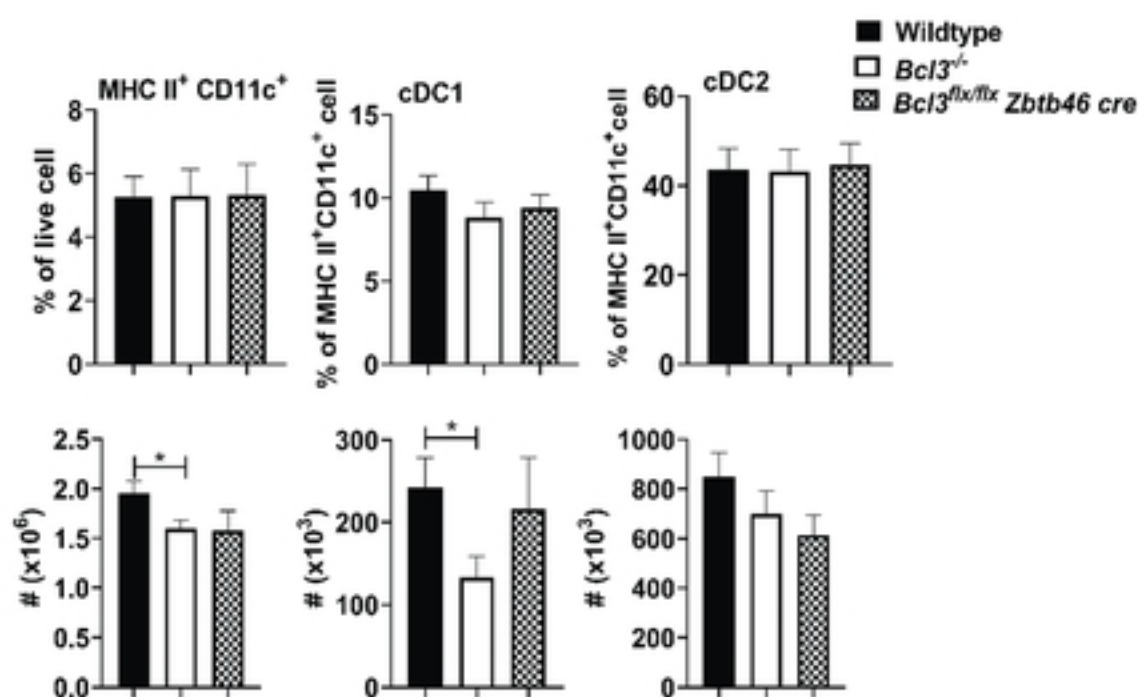

Figure 4

# Figure 5

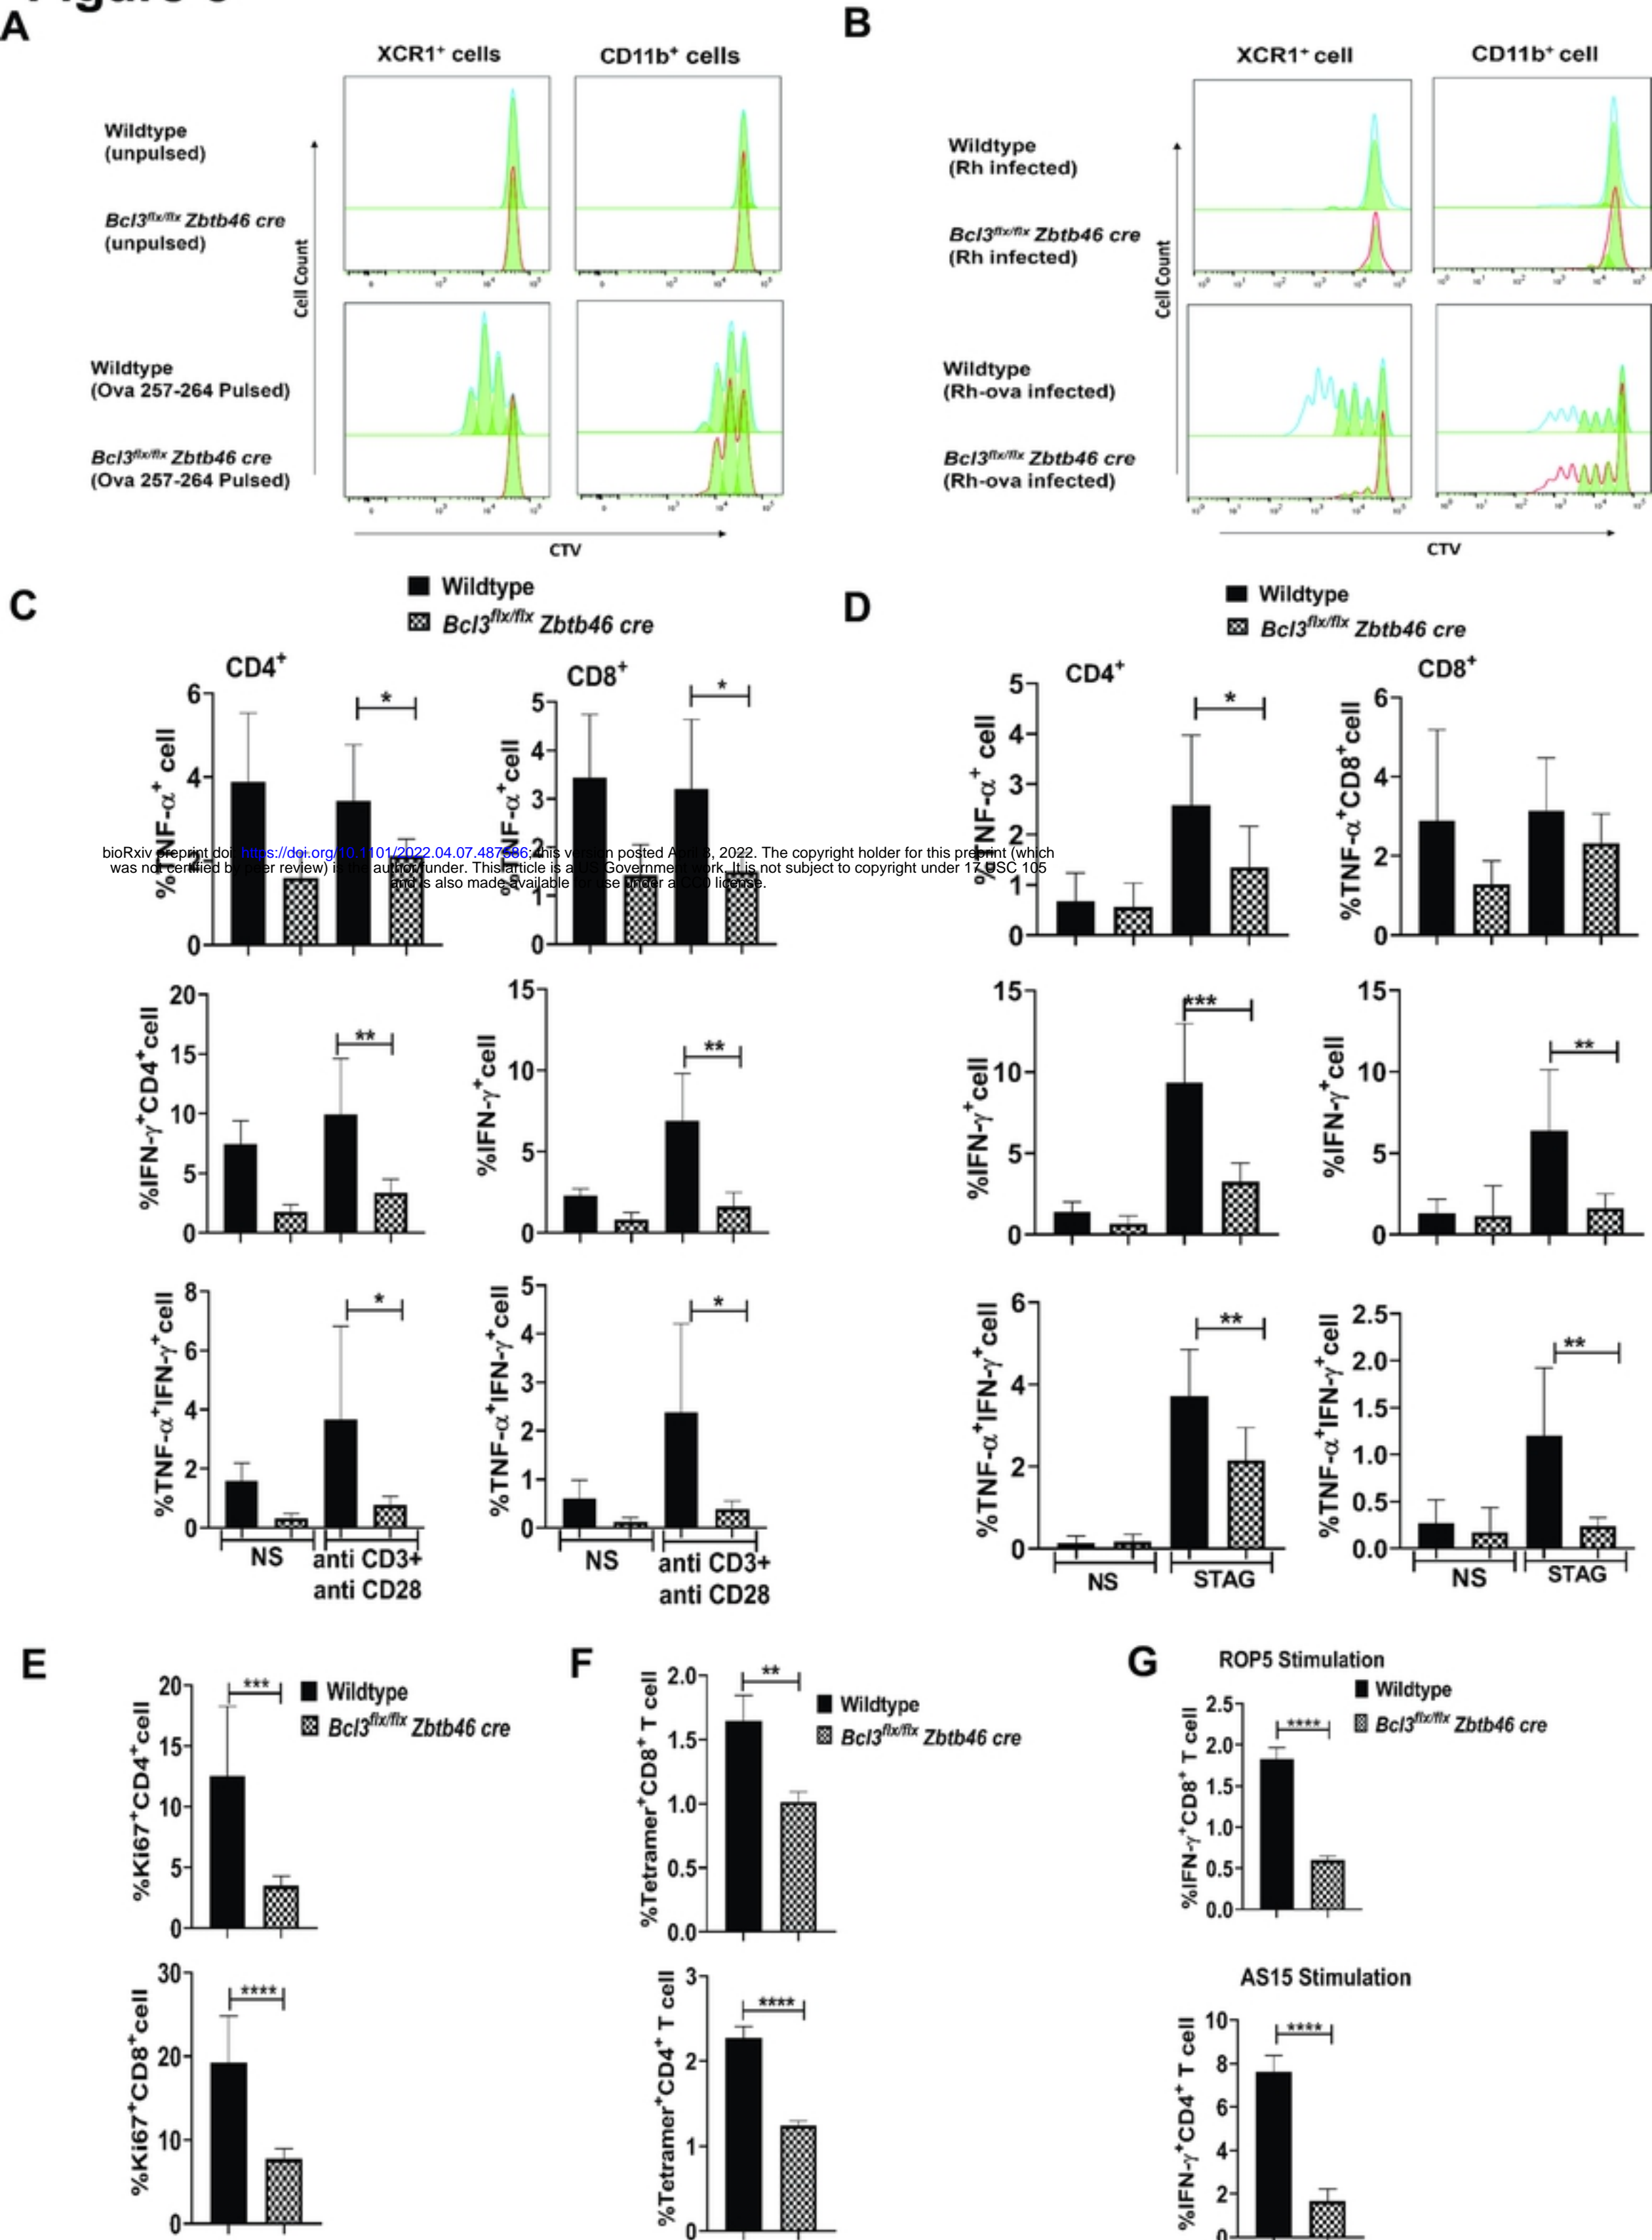

Figure 5

**Figure 6**

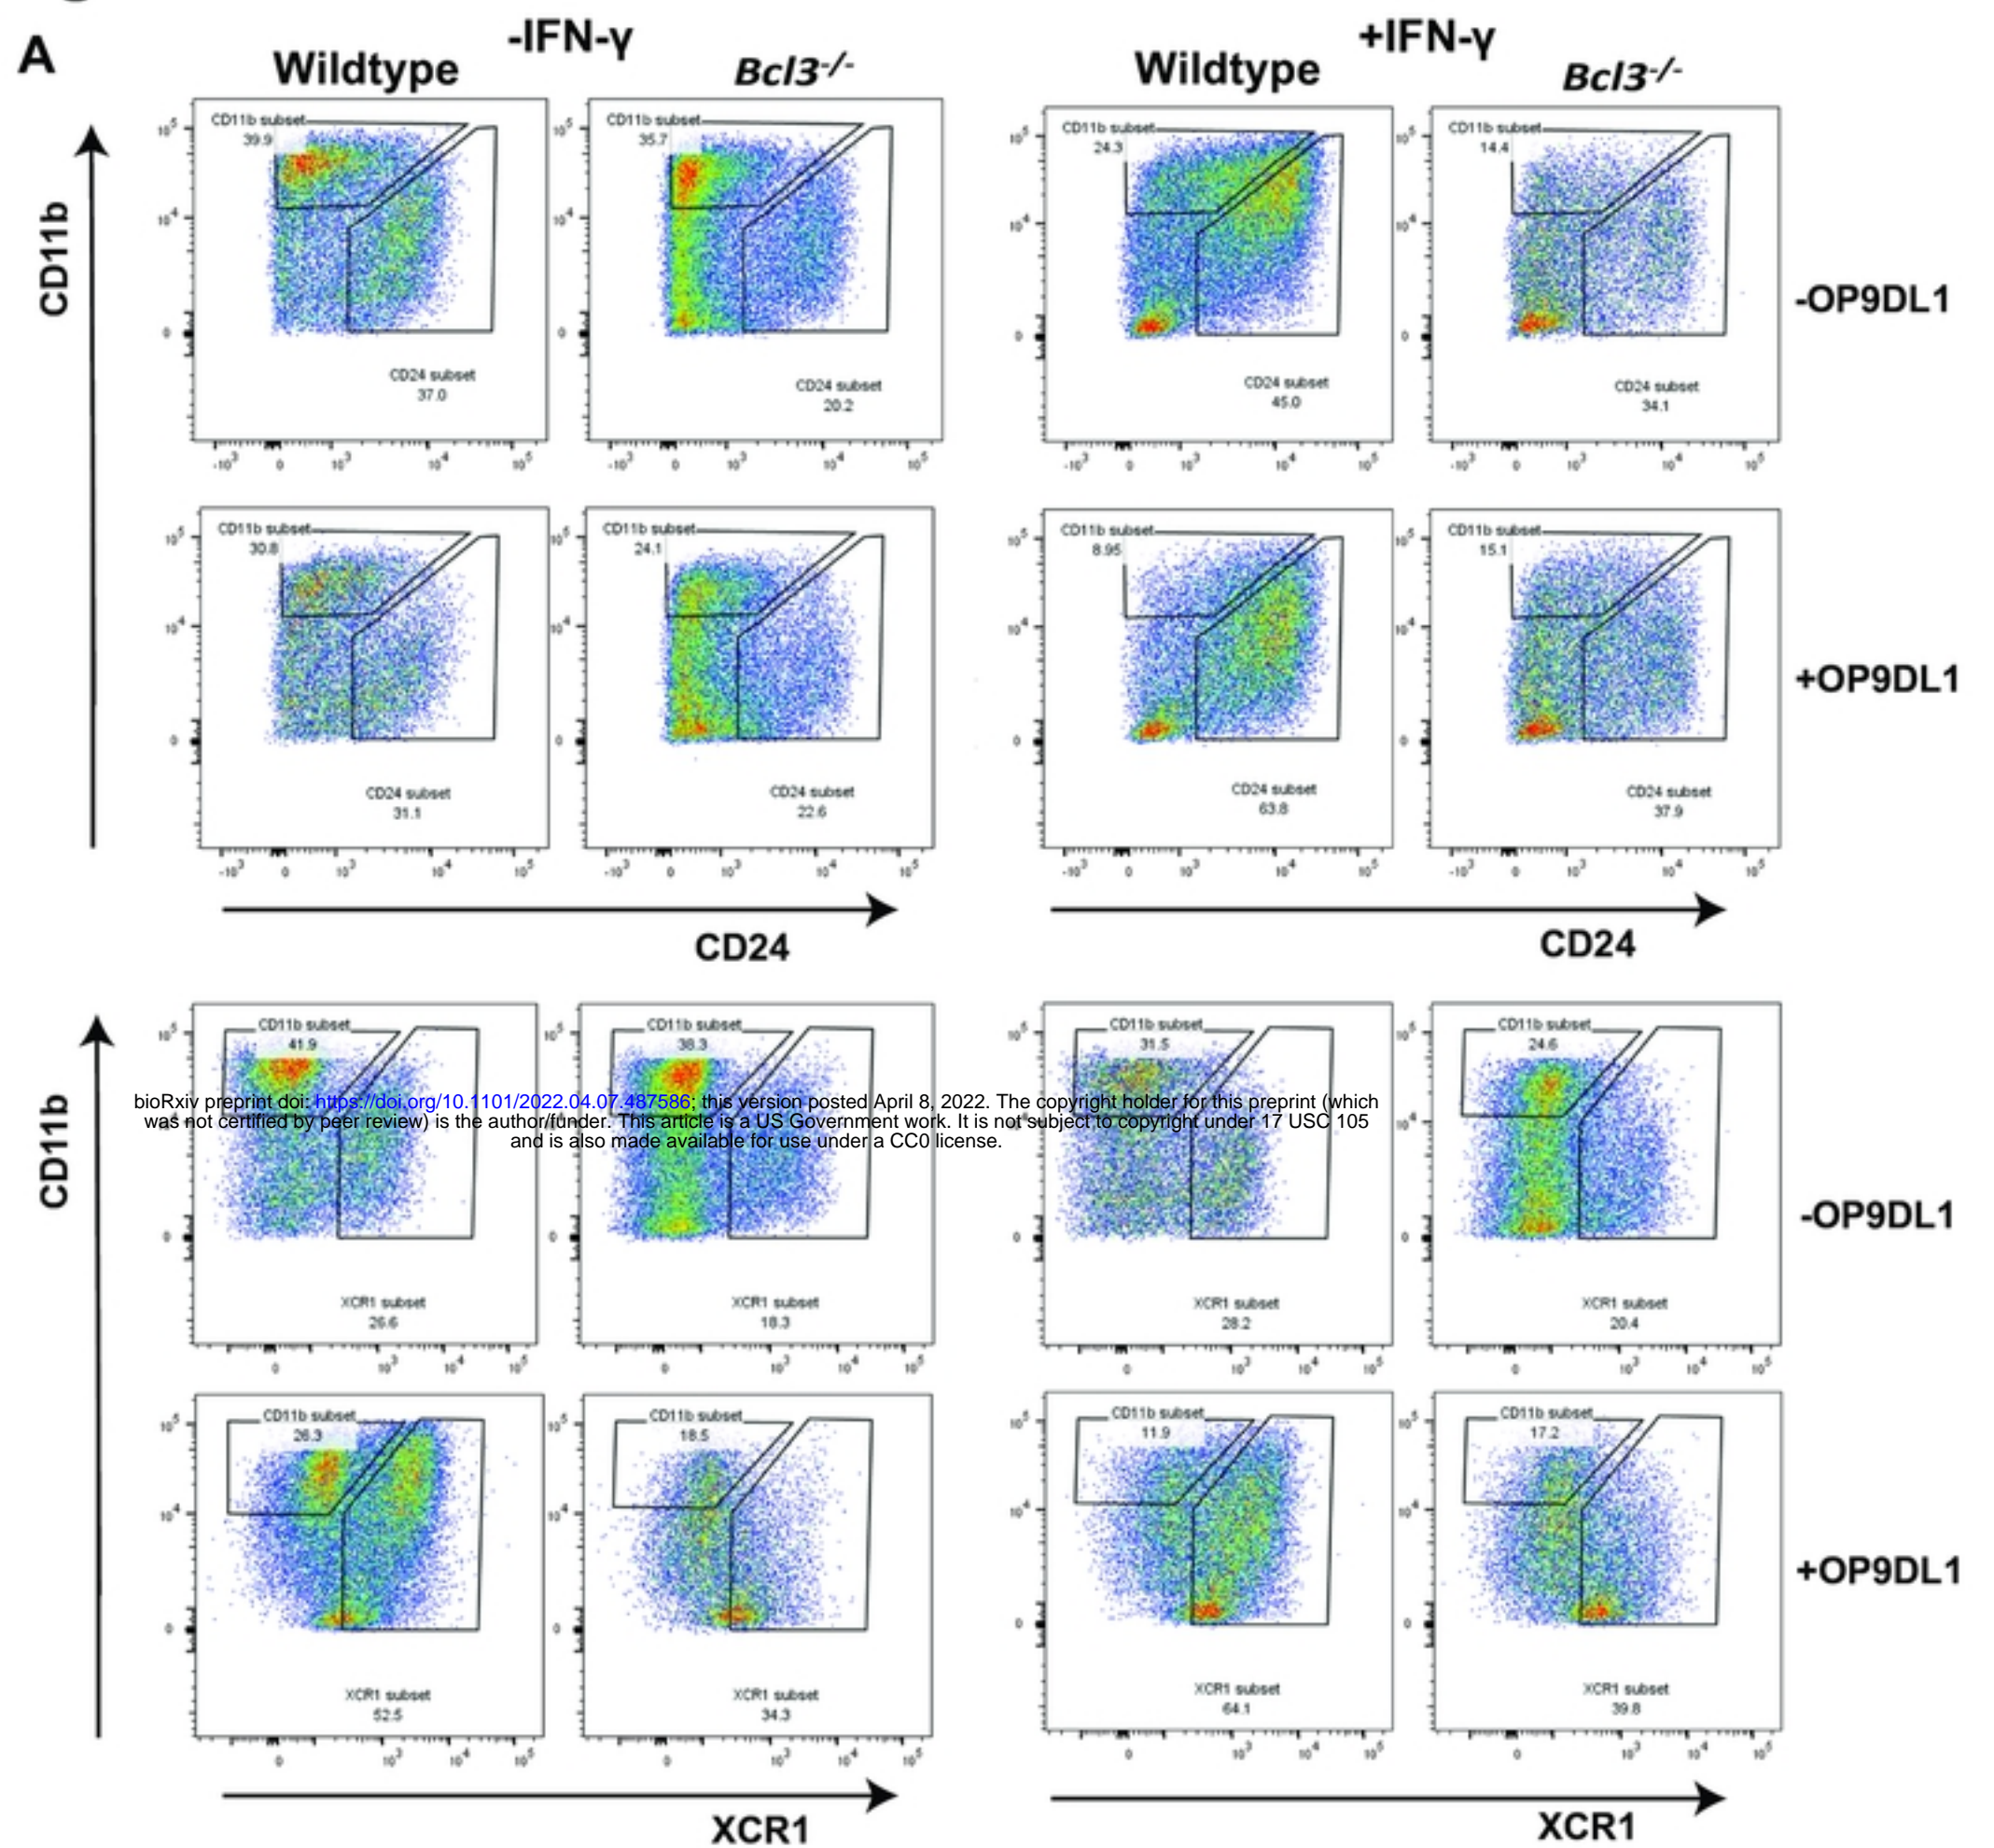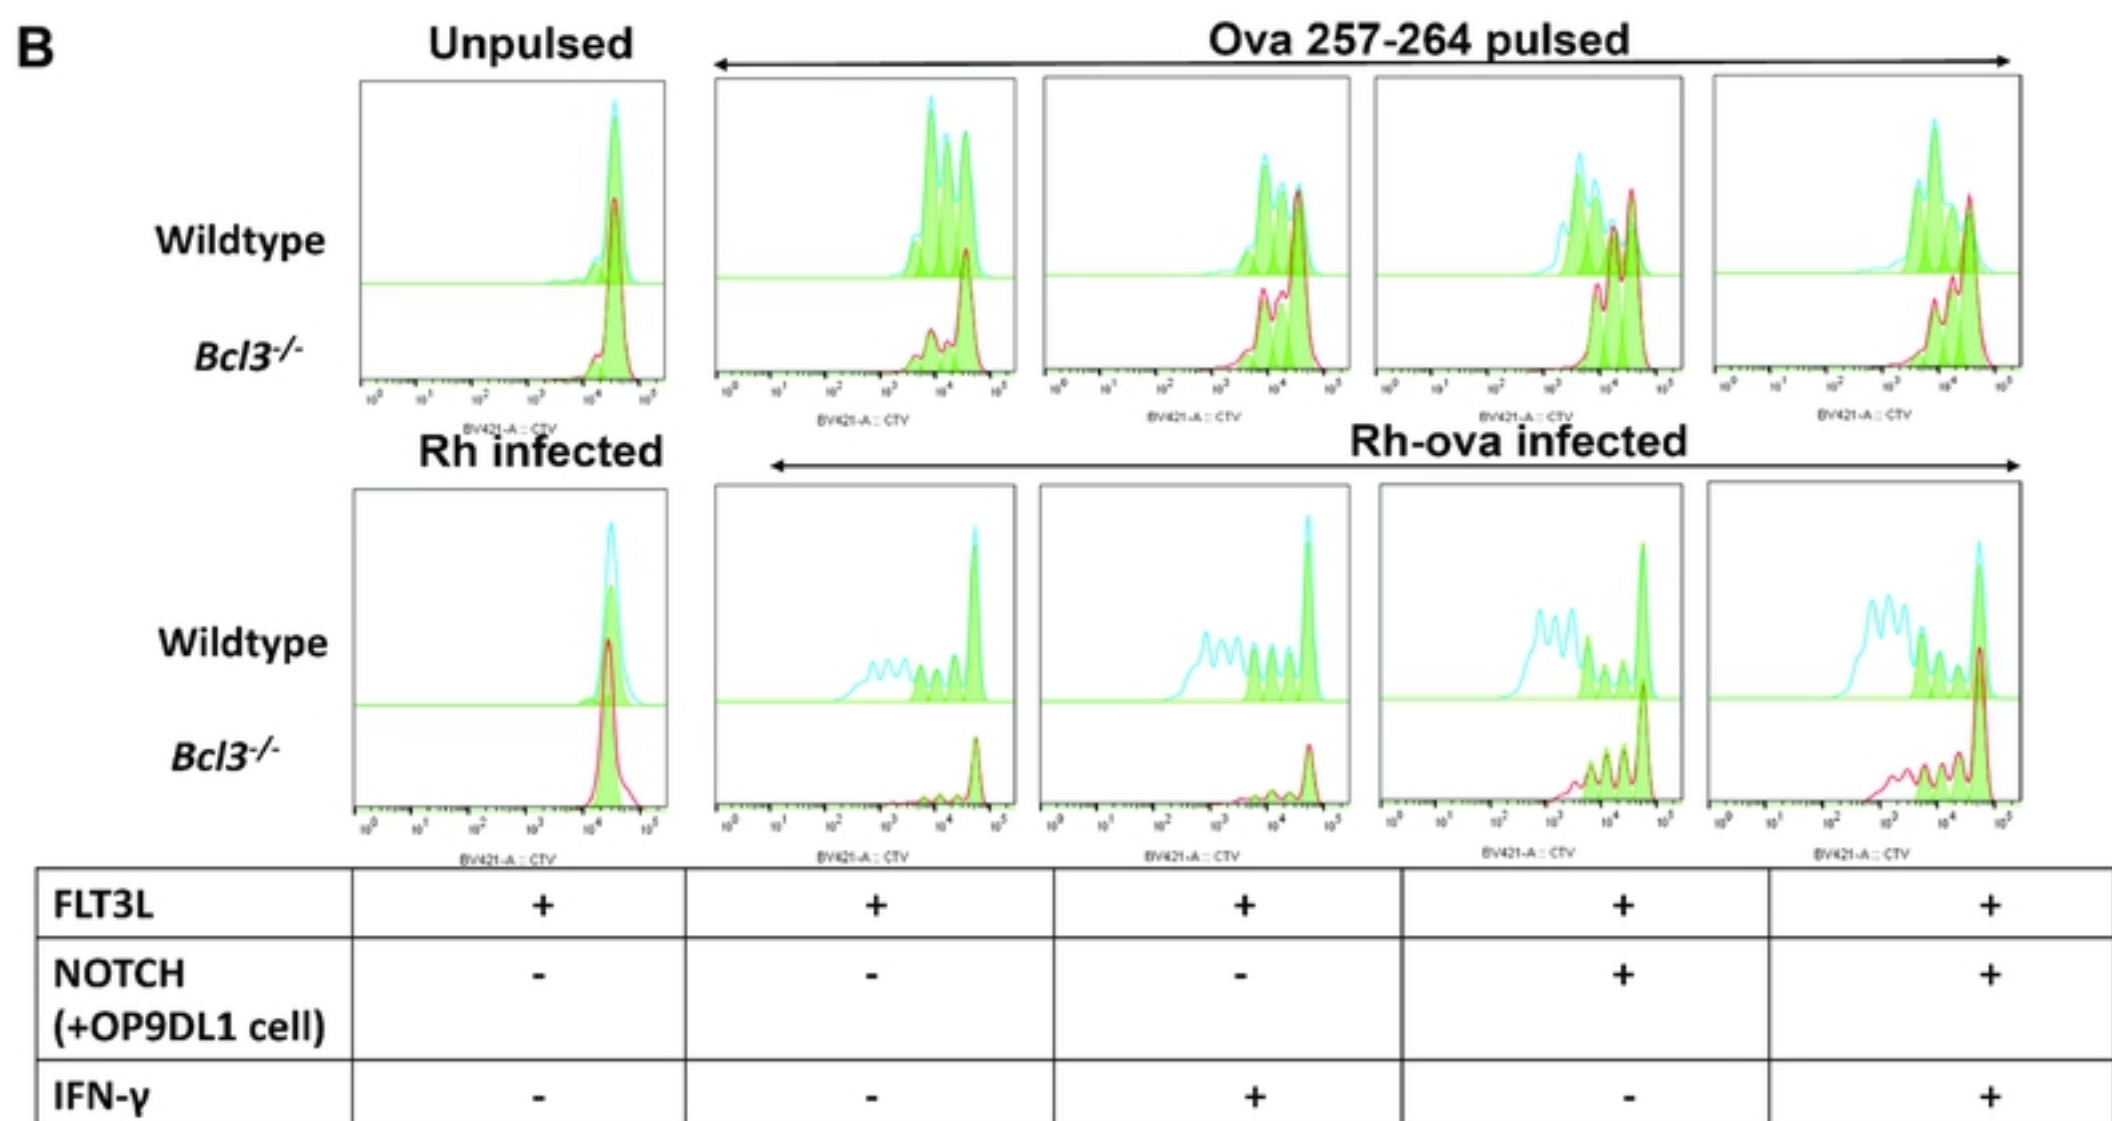

**Figure 6**
